# Supplementary material for: SmMYB36, a Novel R2R3-MYB Transcription Factor, Enhances Tanshinone Accumulation and Decreases Phenolic Acid Content in Salvia miltiorrhiza Hairy Roots
Source: PubMed Central journal article supplement (PMC5506036; doi:10.1038/s41598-017-04909-w), 2017-07-11
Supplement: 41598_2017_4909_MOESM1_ESM.pdf [file 41598_2017_4909_MOESM1_ESM.pdf]

# **SmMYB36, a Novel R2R3-MYB Transcription Factor, Enhances Tanshinone Accumulation and Decreases Phenolic Acid Content in *Salvia miltiorrhiza* Hairy Roots**

**Kai Ding<sup>1</sup>, Tianlin Pei<sup>1</sup>, Zhengqing Bai<sup>1</sup>, Yanyan Jia<sup>1</sup>, Pengda Ma<sup>1\*</sup>, Zongsuo Liang<sup>1,2\*</sup>**

<sup>1</sup>College of Life Sciences, Northwest A&F University, Yangling, Shaanxi, China.

<sup>2</sup>College of Life Sciences, Zhejiang Sci-Tech University, Hangzhou, Zhejiang, China.

**\* Correspondence:**

Pengda Ma, mapengda@163.com

Zongsuo Liang, liangzs@ms.iswc.ac.cn

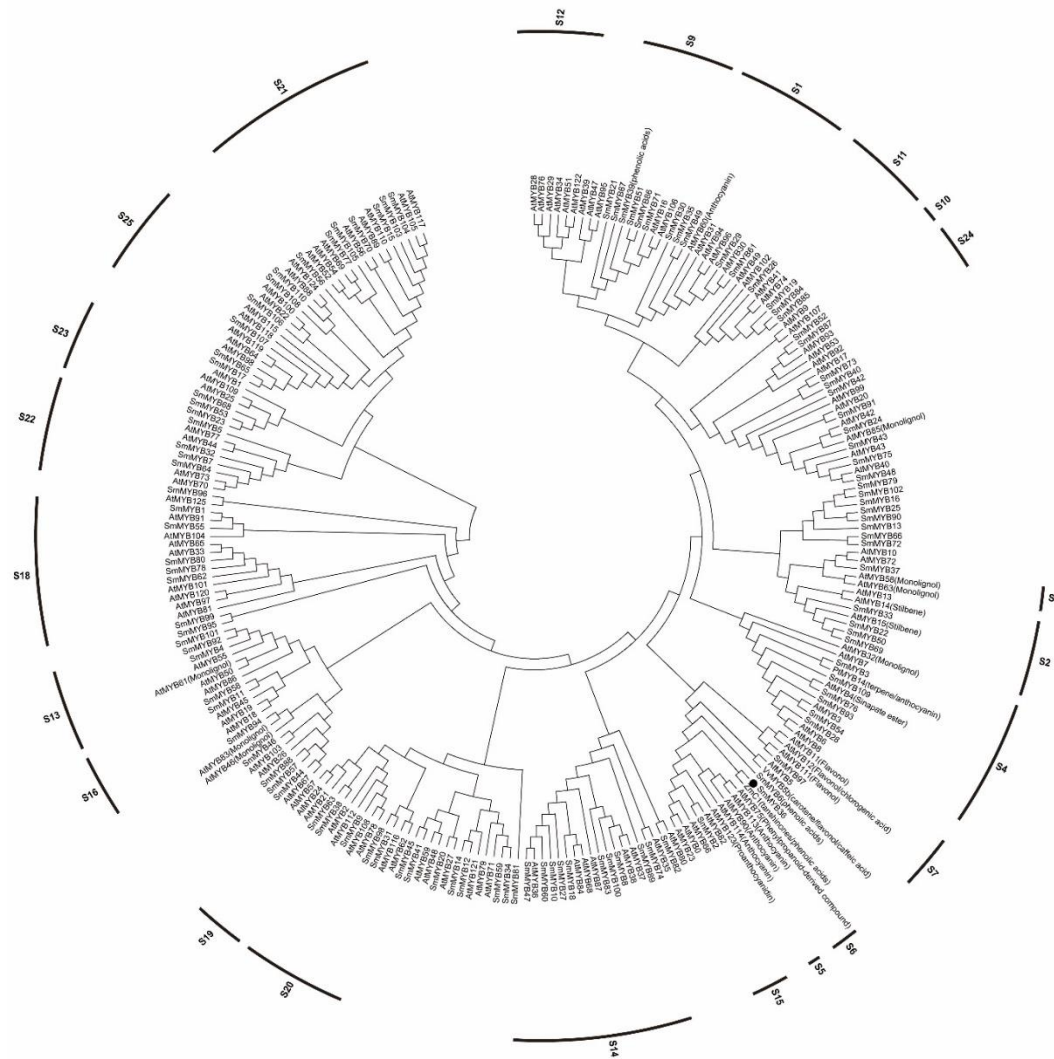

Supplementary Fig. S1. The phylogenetic tree for predicting the function of SmMYB36. The phylogenetic tree was constructed by maximum likelihood method of MEGA 6.06 based on the multiple sequence alignment using ClustalW method. The amino acid sequences of SmMYB36, ZmC1, VvMYB5b, PtMYB14 and all R2R3-MYBs of *Arabidopsis thaliana* and *Salvia miltiorrhiza* were used to construct the tree. SmMYB36 gathers together with these R2R3-MYBs whose function is regulating terpene or phenylpropanoid-derived compound biosynthesis.

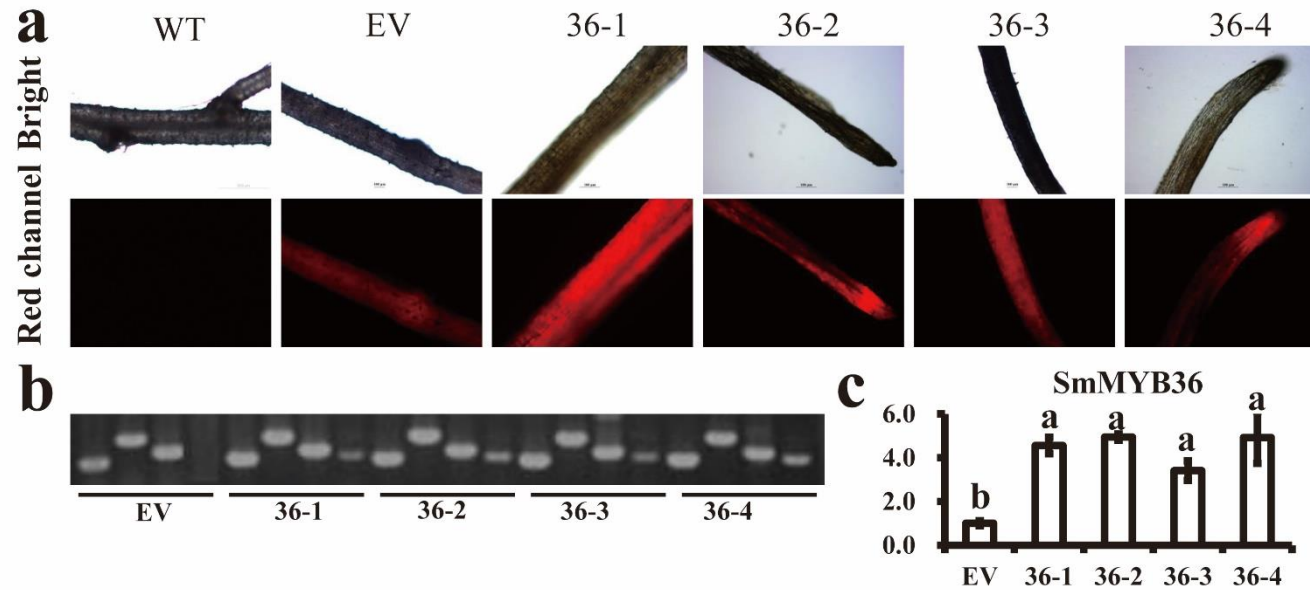

Supplementary Figure S2. (a) Bright field (upper lane) and red fluorescent field (bottom lane) of hairy roots of *Salvia miltiorrhiza*. Fluorescence was observed using a fluorescent microscope after harvest. (b) PCR identifications of hairy roots using *rolB*, *rolC*, *npt* and *SmMYB36* specific primers. The pictures show WT (infected by *Agrobacterium rhizogenes* strain ATCC15834), EV (infected by *Agrobacterium rhizogenes* strain ATCC15834 containing plasmid pK7FWG2R-EV), line 36-1, line 36-2, line 36-3, line 36-4 (infected by *Agrobacterium rhizogenes* strain ATCC15834 containing plasmid pK7FWG2R-SmMYB36) hairy roots from left to right. (c) Relative expression level of *SmMYB36* in transgenic hairy roots.

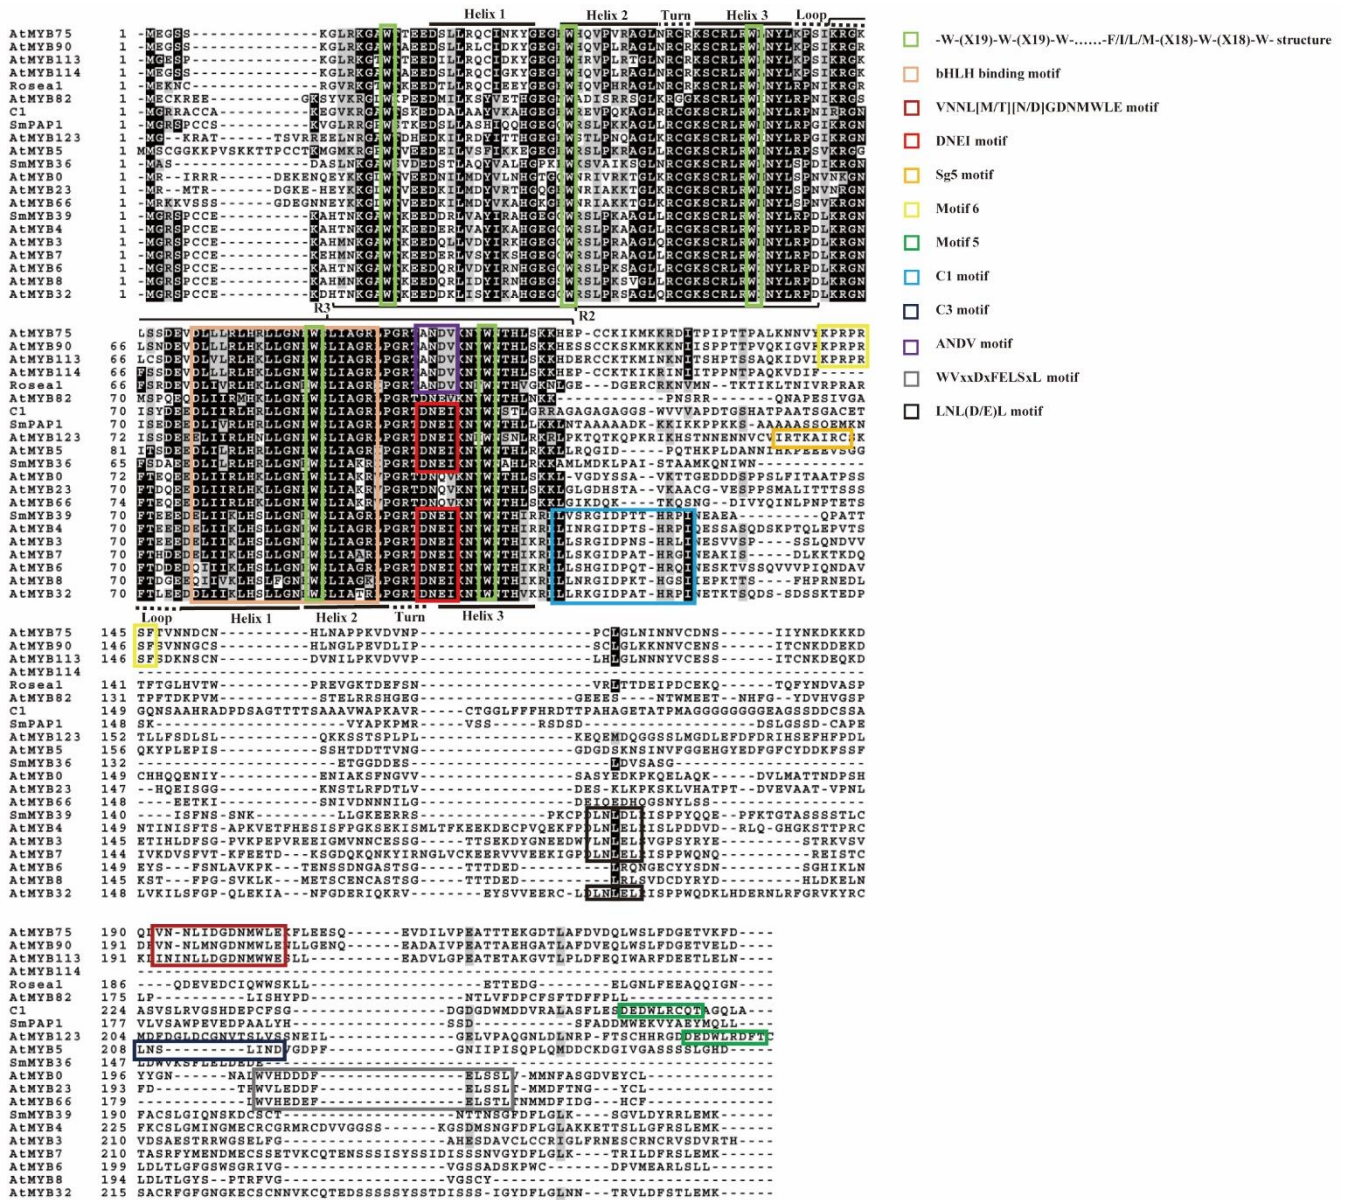

Supplementary Figure S3. The multiple sequence alignment and motif analysis of R2R3-MYB transcription factors.

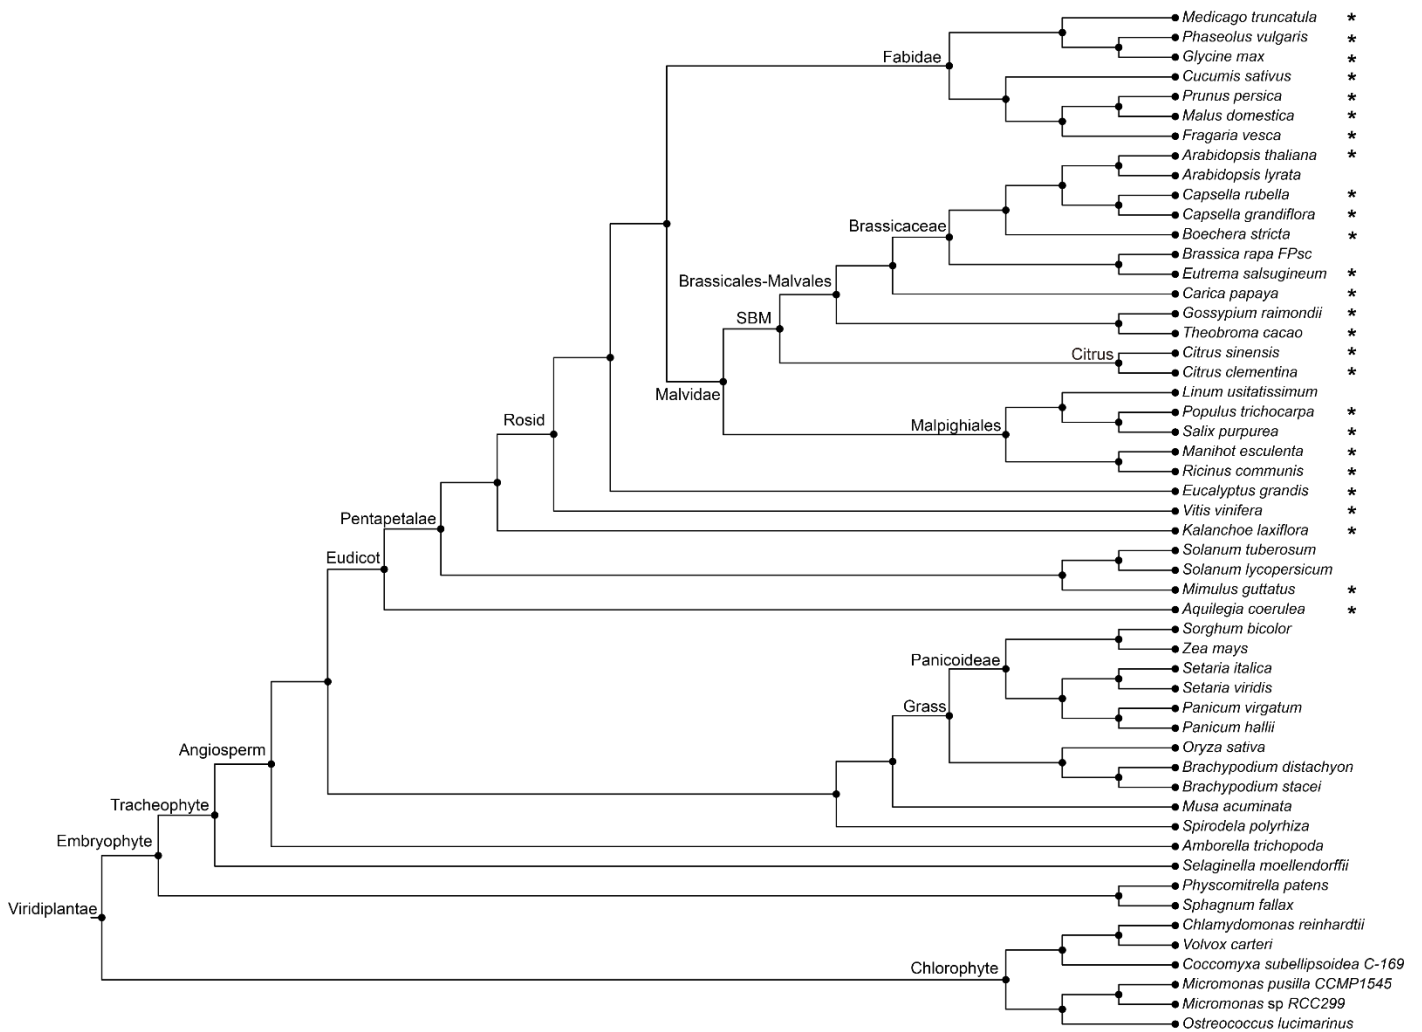

Supplementary Figure S4. The species phylogenetic tree which was slightly modified from the tree representation of the species in Phytozome v11.0. The species were emphasized (\*) which contains the predicted orthologous genes of SmMYB36.





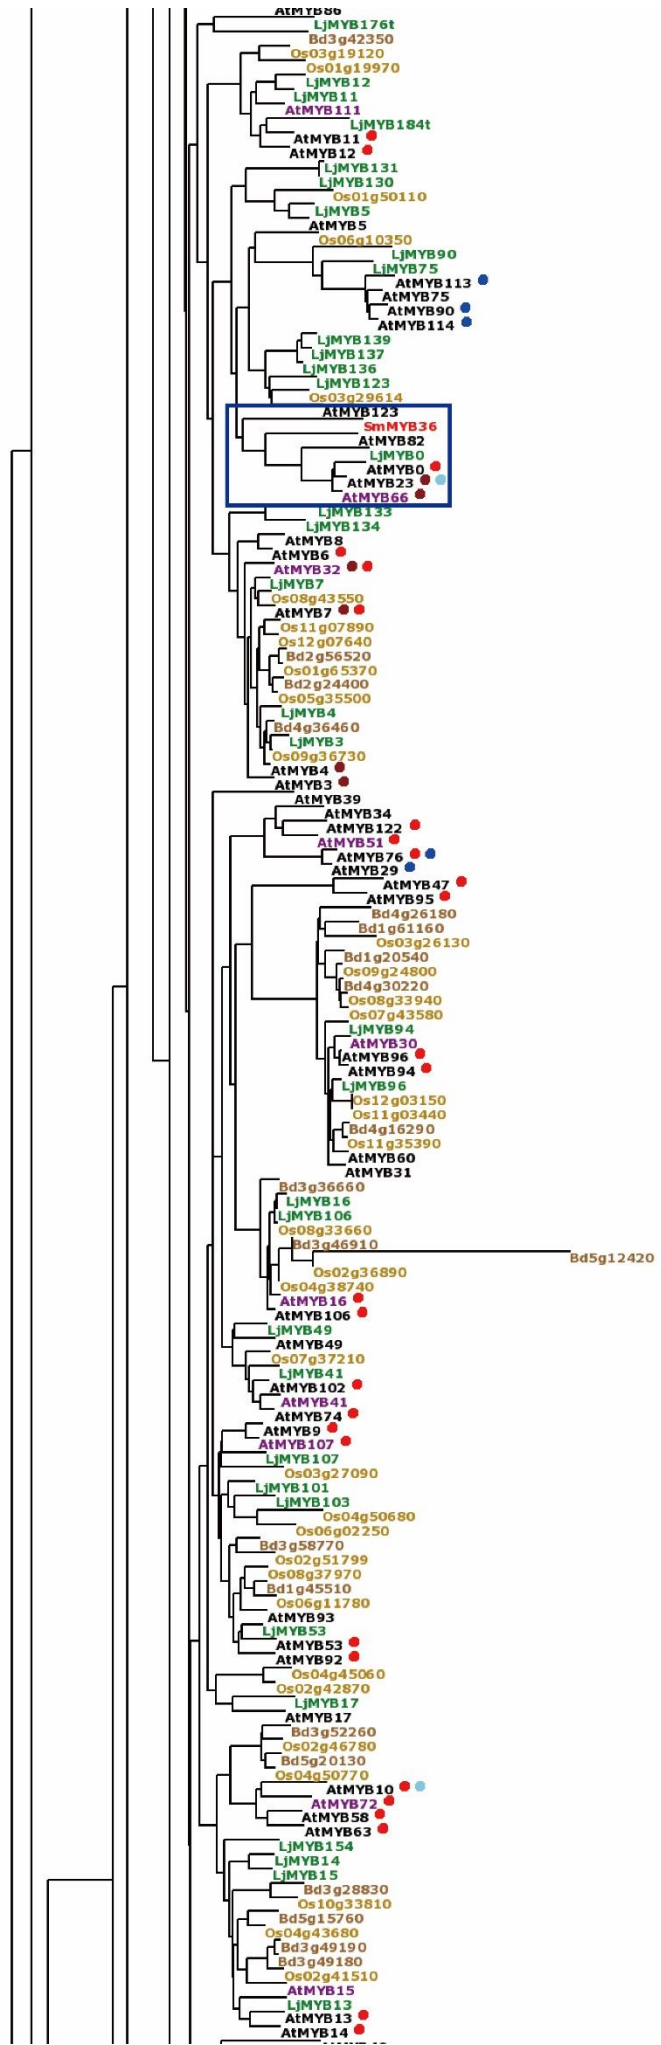

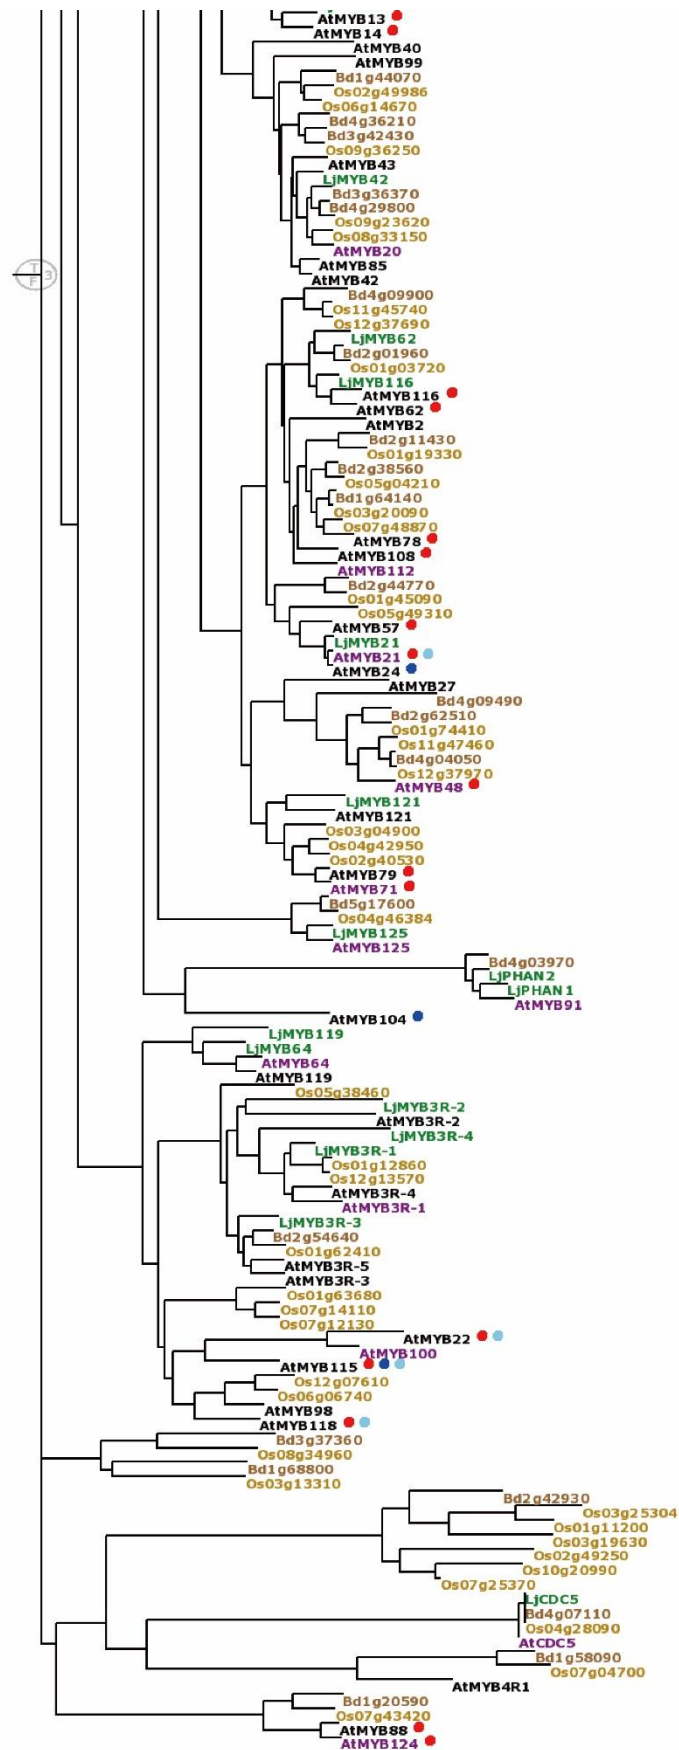

Supplementary Figure S5. The phylogenetic tree of R2R3-MYB transcription factors based on IT3F. The phylogenetic tree was constructed by submitting the amino acid sequence of SmMYB36 to the R2R3-MYB protein family of *Arabidopsis thaliana*, *Oryza sativa* L., *Brachypodium distachyon* and *Lotus japonicas* in IT3F website (<http://jicbio.nbi.ac.uk/IT3F/>). The red text represents the query sequence (SmMYB36) and the R2R3-MYBs of *A.thaliana* were outlined by blue box which have the closest relationships with SmMYB36.



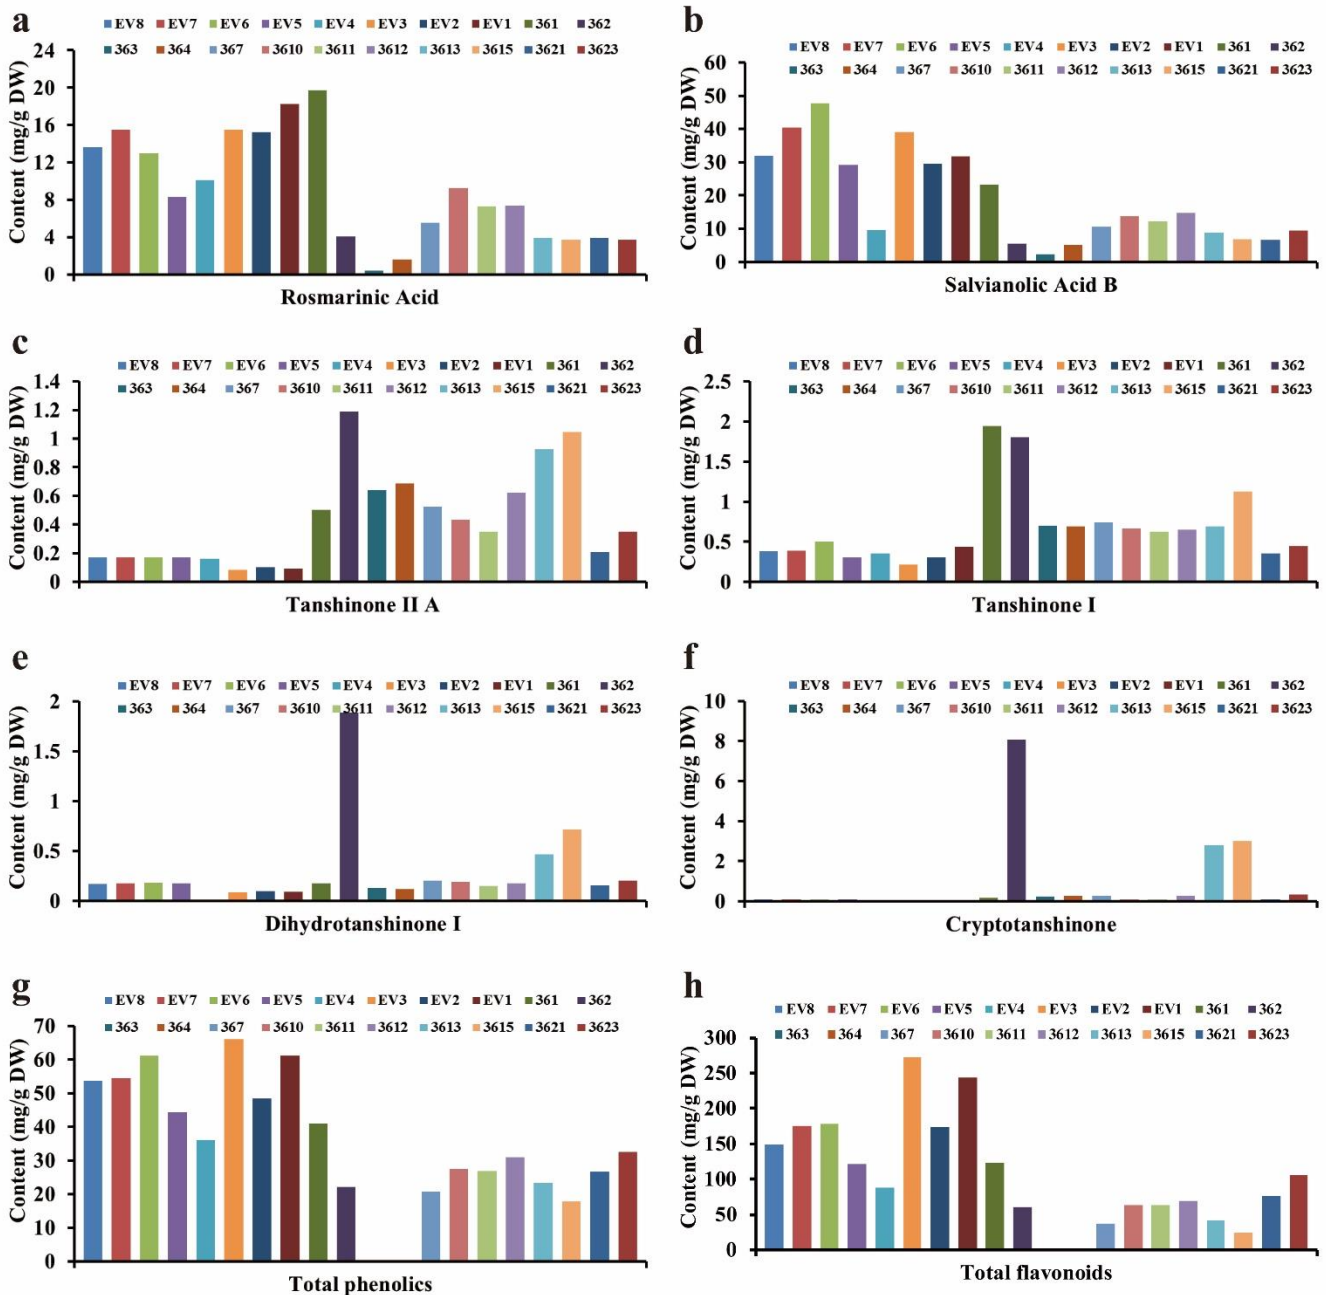

Supplementary Fig. S6. The preliminary experiment results of twelve *SmMYB36*-overexpressing lines (without replicates) and eight empty-vector control lines (without replicates). (a) The content of rosmarinic acid in hairy roots. (b) The content of salvianolic acid B in hairy roots. (c) The content of tanshinone II A in hairy roots. (d) The content of tanshinone I in hairy roots. (e) The content of dihydrotanshinone I in hairy roots. (f) The content of cryptotanshinone in hairy roots. (g) The content of total phenolics in hairy roots. The content of line 363 and 364 was not detected. (h) The content of total flavonoids in hairy roots. The content of line 363 and 364 was not detected.

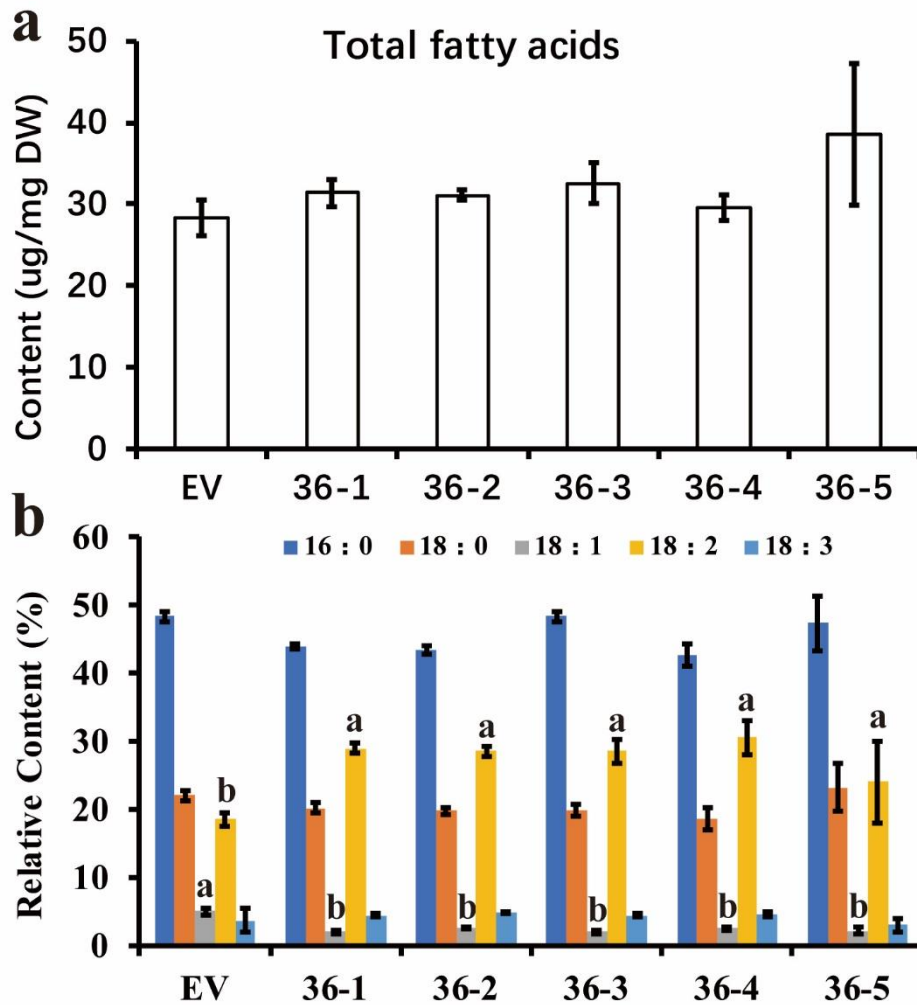

Supplementary Fig. S7. (a) The content of total fatty acids in hairy roots of *S. miltiorrhiza*. (b) The relative contents of palmitic acid (C16:0), stearic acid (18:0), oleic acid (C18:1), linoleic acid (C18:2), linolenic acid (C18:3) in hairy roots of *S. miltiorrhiza*. The GC analysis have three biological repeats of transgenic lines and each biological repeat has three technological repeats. The metabolite contents were shown by their means  $\pm$  SD.

Supplementary Table S1. Primers and probes used in the research

| Primer Name  | Primer Sequence (5' to 3')                              | Description                                                                                      |
|--------------|---------------------------------------------------------|--------------------------------------------------------------------------------------------------|
| SmMYB36 F1   | GGGGACAAGTTTGTACAAAAAAGCAGGCTTAATG<br>GCGAGTGATGCATCTCT | The primers were used to generate the pDONR207-SmMYB36 entry vector.                             |
| SmMYB36 R1   | GGGGACCACTTTGTACAAGAAAGCTGGGTATCATT<br>CATCCTCGTCGAGTTC |                                                                                                  |
| SmMYB36 F2   | CCGCTCGAGATGGCGAGTGATGCATCT                             | The primers were used to generate the pA7-GFP-SmMYB36 vector.                                    |
| SmMYB36 R2   | GGACTAGTGATTCATCCTCGTCGAGTTCAAGAAA                      |                                                                                                  |
| SmMYB36 F3   | ATTTGGAGAGGACTCCGGTATT                                  | The primers were used to identify positive hairy roots.                                          |
| SmMYB36 R3   | AATCCAACCCAGAGGCAGAG                                    |                                                                                                  |
| SmMYB36 F4   | CCTCAACAGGTGCGGTAAGAGTT                                 | The primers were used to quantitative analysis of SmMYB36.                                       |
| SmMYB36 R4   | TTCTTCCTCAAGTGAGCATTCCAGT                               |                                                                                                  |
| ro1B F       | GCTCTTGCAGTGCTAGATTT                                    | The primers were used to confirm transgenic hairy roots.                                         |
| ro1B R       | GAAGGTGCAAGCTACCTCTC                                    |                                                                                                  |
| ro1C F       | CTCCTGACATCAAACCTCGTC                                   | The primers were used to confirm transgenic hairy roots.                                         |
| ro1C R       | TGCTTCGAGTTATGGGTACA                                    |                                                                                                  |
| NPT F        | ACGTTGTCACTGAAGCGGGAAGG                                 | The primers were used to confirm transgenic hairy roots.                                         |
| NPT R        | GGCGATACCGTAAAGCACGAGGAA                                |                                                                                                  |
| SmMYB36 F5   | GTTATTTCAATTGGAGAGGACTCCG                               | The primers were exogenous SmMYB36 specific primers and used to confirm transgenic hairy roots.  |
| SmMYB36 R5   | CCAGTAGTTCTTGATCTCGTTGTC                                |                                                                                                  |
| SmMYB36 F6   | CGCGGATCCATGGCGAGTGATGCATCT                             | The primers were used to generate the pET32a-SmMYB36 vector                                      |
| SmMYB36 R6   | CCGCTCGAGTTCATCCTCGTCGAGTTCAAG                          |                                                                                                  |
| C4H1-MBS1-F  | TCTTTAAACTCCA <b>ACT</b> GATATGATGTTTCG                 | The primers were used to generate the specific C4H1-MBS1 probe of <i>C4H1</i> promoter for EMSA. |
| C4H1-MBS1-R  | CGAACATCATATC <b>AGTT</b> GGAGTTTTAAAGA                 |                                                                                                  |
| C4H1-MBS3-F  | GTTTAAAAGACATA <b>ACT</b> GAGTTATCGAACA                 | The primers were used to generate the specific C4H1-MBS3 probe of <i>C4H1</i> promoter for EMSA. |
| C4H1-MBS3-R  | TGTTCGATA <b>ACTCAGTT</b> ATGTCTTTTAAAC                 |                                                                                                  |
| 4CL2-MRE-F   | TTTGTAGAGTT <b>GAACCTAA</b> AGATGATGGGTG                | The primers were used to generate the specific 4CL2-MRE probe of <i>4CL2</i> promoter for EMSA.  |
| 4CL2-MRE-R   | CACCCATCATCT <b>TTAGGTT</b> CAACTCTACAAA                |                                                                                                  |
| HPPR-MRE-1-F | TTTTGTGGGACAA <b>ACCTAAAA</b> AAGAACTGAA                | The primers were used to generate the specific HPPR-MRE probe of <i>HPPR</i> promoter for EMSA.  |
| HPPR-MRE-1-R | TTCAGTTTCTTT <b>TTAGGTT</b> TGTCCACAAAA                 |                                                                                                  |
| HPPR-MRE-2-F | AATGATTGATTT <b>AACTAAT</b> CATTGTGAAACC                | The primers were used to generate the specific                                                   |

---

|               |                                          |                                                                                                      |
|---------------|------------------------------------------|------------------------------------------------------------------------------------------------------|
| HPPR-MRE-2-R  | GGTTTCACAATGATTAGGTTAAATCAATCATT         | HPPR-MRE probe of <i>HPPR</i> promoter for EMSA.                                                     |
| DFR-MBS3-F    | AGCTAGCTAATTA <b>ACT</b> GAAAAACAATATT   | The primers were used to generate the specific DFR-MBS3 probe of <i>DFR</i> promoter for EMSA.       |
| DFR-MBS3-R    | AATATTGTTTTT <b>CAGTTA</b> ATTAGCTAGCT   |                                                                                                      |
| DXR-MRE-F     | CCCCTTTTACAAA <b>ACCTA</b> ATTTCCCCCAT   | The primers were used to generate the specific DXR-MRE probe of <i>DXR</i> promoter for EMSA.        |
| DXR-MRE-R     | ATGGGGGGAAAT <b>TAGGTTT</b> TGAAAAGGGG   |                                                                                                      |
| MCT-MBS2-1-F  | AGGAAACCCTC <b>ACGGTC</b> ACCTTAACATTCA  | The primers were used to generate the specific MCT-MBS2 probe of <i>MCT</i> promoter for EMSA.       |
| MCT-MBS2-1-R  | TGAATGTTAAGGT <b>GACCGT</b> GAGGGTTTCCT  |                                                                                                      |
| MCT-MBS2-2-F  | AAAACAGGCAT <b>CGGTC</b> AGTAAGTCCGCAT   | The primers were used to generate the specific MCT-MBS2 probe of <i>MCT</i> promoter for EMSA.       |
| MCT-MBS2-2-R  | ATGCGGACTT <b>ACTGACCG</b> GATGCCTGTTTT  |                                                                                                      |
| MCT-MBS3-1-F  | TATCATCTTCGGT <b>AACTG</b> ATACTCAAGGAT  | The primers were used to generate the specific MCT-MBS3 probe of <i>MCT</i> promoter for EMSA.       |
| MCT-MBS3-1-R  | ATCCTTGAGTAT <b>CAGTTAC</b> CGAAGATGATA  |                                                                                                      |
| MCT-MBS3-2-F  | AACTAGATGAAT <b>AACTGG</b> TAGCAATTACC   | The primers were used to generate the specific MCT-MBS3 probe of <i>MCT</i> promoter for EMSA.       |
| MCT-MBS3-2-R  | GGTAATTGCTACC <b>AGTTA</b> ATTCATCTAGTT  |                                                                                                      |
| CMK-MBS1-F    | TGAAGAATGGTG <b>CAACTG</b> CAATCAGTAAAA  | The primers were used to generate the specific CMK-MBS1 probe of <i>CMK</i> promoter for EMSA.       |
| CMK-MBS1-R    | TTTTACTGATT <b>GCAGTTG</b> CACCATTCTTCA  |                                                                                                      |
| CMK-MBS3-F    | CTCCTAATTATATA <b>AACTGT</b> CTCTGTATTAT | The primers were used to generate the specific CMK-MBS3 probe of <i>CMK</i> promoter for EMSA.       |
| CMK-MBS3-R    | ATAATACAGAGAC <b>AGTTAT</b> ATAATTAGGAG  |                                                                                                      |
| CMK-MRE-1-F   | TCCACACTACAAA <b>ACCTAAC</b> CCTAACCGTA  | The primers were used to generate the specific CMK-MRE probe of <i>CMK</i> promoter for EMSA.        |
| CMK-MRE-1-R   | TACGGTTAGGGT <b>TAGGTTT</b> TGTAGTGTGGA  |                                                                                                      |
| CMK-MRE-2-F   | AGAATGGAATTT <b>AACCTAA</b> ATTAGTGTTC   | The primers were used to generate the specific CMK-MRE probe of <i>CMK</i> promoter for EMSA.        |
| CMK-MRE-2-R   | TGAACACTAAT <b>TAGGTTA</b> AATTCCATTCT   |                                                                                                      |
| GGPPS1-MBS2-F | TTAAAATCGTT <b>ACGGTC</b> ATACCACGGAAAC  | The primers were used to generate the specific GGPPS1-MBS2 probe of <i>GGPPS1</i> promoter for EMSA. |
| GGPPS1-MBS2-R | GTTCCGTGGTAT <b>GACCGT</b> AACGATTTAA    |                                                                                                      |
| GGPPS1-MRE-F  | TTTTTCGATAGT <b>AACCTA</b> ATTTTCTGTAGTG | The primers were used to generate the specific GGPPS1-MRE probe of <i>GGPPS1</i> promoter for EMSA.  |
| GGPPS1-MRE-R  | CACTACAGAAA <b>ATTAGGTT</b> ACTATCGAAAA  |                                                                                                      |

---

|              |                                          |                                                                                                                  |
|--------------|------------------------------------------|------------------------------------------------------------------------------------------------------------------|
| IPPI-MBS1-F  | CCGCCGCCGCCACA <b>ACT</b> GTAATGGTGCTTT  | The primers were used to generate the specific IPPI-MBS1 probe of <i>IPPI</i> promoter for EMSA.                 |
| IPPI-MBS1-R  | AAAGCACCATTACAGTTGTGGCGGCGGCGG           |                                                                                                                  |
| HMGS1-MBS3-F | GTGTGTGCTGTT <b>TA</b> ACTGATCCGCTATTTTC | The primers were used to generate the specific HMGS1-MBS3 probe of <i>HMGS1</i> promoter for EMSA.               |
| HMGS1-MBS3-R | GAAATAGCGGATCAGTTAAACAGCACACAC           |                                                                                                                  |
| MBS I -1-F   | AAAAA <b>ACCGTTA</b>                     | The primers were used to generate the core MBS I probe for EMSA.                                                 |
| MBS I -1-R   | <b>TAACGGTTTTTTT</b>                     |                                                                                                                  |
| MBS I -2-F   | AAAAA <b>ACCGTTA</b>                     | The primers were used to generate the core MBS I probe for EMSA.                                                 |
| MBS I -2-R   | <b>TAACCGTTTTTTT</b>                     |                                                                                                                  |
| MBS II -F    | AAAAG <b>TTAGTTA</b>                     | The primers were used to generate the core MBS II probe for EMSA.                                                |
| MBS II -R    | <b>TAACTAACTTTT</b>                      |                                                                                                                  |
| MBSF1        | <b>CAACTG</b>                            | The primers were used to generate the core MBS1 probe for EMSA.                                                  |
| MBSR1        | <b>CAGTTG</b>                            |                                                                                                                  |
| MBSF2        | <b>CGGTCA</b>                            | The primers were used to generate the core MBS2 probe for EMSA.                                                  |
| MBSR2        | <b>TGACCG</b>                            |                                                                                                                  |
| MBSF3        | <b>TAACTG</b>                            | The primers were used to generate the core MBS3 probe for EMSA.                                                  |
| MBSR3        | <b>CAGTTA</b>                            |                                                                                                                  |
| MREF         | <b>AACCTAA</b>                           | The primers were used to generate the core MRE probe for EMSA.                                                   |
| MRER         | <b>TTAGGTT</b>                           |                                                                                                                  |
| 6CKF         | GATT <b>CG</b>                           | The primers were used to generate the control probe for the core probe (MBS1) for EMSA.                          |
| 6CKR         | CGA <b>ATC</b>                           |                                                                                                                  |
| 7CKF         | AGAA <b>AGC</b>                          | The primers were used to generate the control probe for the core probe (MRE) for EMSA.                           |
| 7CKR         | GCTTT <b>CT</b>                          |                                                                                                                  |
| 12CKF        | AGTTTT <b>CTTGAA</b>                     | The primers were used to generate the control probe for three core probes (MBS I -1, MBS I -2, MBS II) for EMSA. |
| 12CKR        | TTCAAGAAA <b>ACT</b>                     |                                                                                                                  |

Note: The **bold** bases represent the MYB-related core elements (MBS1, CAACTG; MBS2, CGGTCA; MBS3, TAACTG; MRE, AACCTAA; MBS I , AAAAAAC(C/G)GTTA; MBS II , AAAAGTTAGTTA).

Supplementary Table S2. The conserved motifs of subgroup 4, 5, 6 and 15

| Amino Acid Sequence                                                                                   | Motif Name         | Subgroup    | Reference |
|-------------------------------------------------------------------------------------------------------|--------------------|-------------|-----------|
| [D/E]Lx2[R/K]x3Lx6Lx3R                                                                                | bHLH binding motif | 4, 5, 6, 15 | 1,2       |
| Lx3GIDPxTHRPI                                                                                         | C1 motif           | 4           | 3         |
| LNL[E/D]L                                                                                             | C3/EAR/ERF motif   | 4           | 2,4       |
| DNEI                                                                                                  | DNEI motif         | 5           | 5         |
| IRTKA[I/L]RC                                                                                          | Sg5 motif          | 5           | 6         |
| DEDWLRxxT                                                                                             | Motif 5            | 5           | 7         |
| KPRPR[S/T]F                                                                                           | Motif 6            | 6           | 8         |
| VNNL[M/T][N/D]GDNMWLE                                                                                 | -                  | 6           | 9         |
| ANDV                                                                                                  | ANDV motif         | 6           | 10        |
| WVxxDxFELsXL                                                                                          | -                  | 15          | 7         |
| -W-(X <sub>19</sub> )-W-(X <sub>19</sub> )-W-.....-F/I/L/M-(X <sub>18</sub> )-W-(X <sub>18</sub> )-W- | -                  | 4, 5, 6, 15 | 8         |

- 1 Bogs, J., Jaffé, F. W., Takos, A. M., Walker, A. R. & Robinson, S. P. The grapevine transcription factor VvMYBPA1 regulates proanthocyanidin synthesis during fruit development. *Plant physiology* **143**, 1347-1361 (2007).
- 2 Deluc, L. *et al.* The transcription factor VvMYB5b contributes to the regulation of anthocyanin and proanthocyanidin biosynthesis in developing grape berries. *Plant physiology* **147**, 2041-2053 (2008).
- 3 Kranz, H. D. *et al.* Towards functional characterisation of the members of the R2R3-MYB gene family from *Arabidopsis thaliana*. *Plant Journal for Cell & Molecular Biology* **16**, 263-276 (1998).
- 4 Ohta, M., Matsui, K., Hiratsu, K., Shinshi, H. & Ohme-Takagi, M. Repression domains of class II ERF transcriptional repressors share an essential motif for active repression. *The Plant cell* **13**, 1959-1968 (2001).
- 5 Nesi, N., Jond, C., Debeaujon, I., Caboche, M. & Lepiniec, L. The *Arabidopsis* TT2 gene encodes an R2R3 MYB domain protein that acts as a key determinant for proanthocyanidin accumulation in developing seed. *The Plant cell* **13**, 2099-2114 (2001).
- 6 Gesell, A., Yoshida, K., Lan, T. T. & Constabel, C. P. Characterization of an apple TT2-type R2R3 MYB transcription factor functionally similar to the poplar proanthocyanidin regulator PtMYB134. *Planta* **240**, 497-511 (2014).
- 7 Takos, A. M. *et al.* Light-induced expression of a MYB gene regulates anthocyanin biosynthesis in red apples. *Plant physiology* **142**, 1216-1232 (2006).
- 8 Dubos, C. *et al.* MYB transcription factors in *Arabidopsis*. *Trends in plant science* **15**, 573-581 (2010).
- 9 Kranz, H. D. *et al.* Towards functional characterisation of the members of the R2R3-MYB gene family from *Arabidopsis thaliana*. *Plant Journal for Cell & Molecular Biology* **16**, 263-276 (1998).
- 10 Lin-Wang, K. *et al.* An R2R3 MYB transcription factor associated with regulation of the anthocyanin biosynthetic pathway in Rosaceae. *BMC plant biology* **10**, 1-17 (2010).



Supplementary Table S3. The promoter sequences of pathway genes which contains MYB-related elements

| Gene Name | Promoter Sequence                                                                                                                                                                                                                                                                                                                                                                                                                                                                                                                                                                                                                                                                                                                                                                                                                                                                                                                                                                                                                                                                                                                                                                                                                                                                                                                                                                                                                                                                                                                                                                                                                                                                                                                                                                                                                                                                                                                                                                                                                                                                                                                                                                                                                                                                                                                                                                                                                                                                                                                                                                                                                                                                                                                                                                                                                                                                                                                                                                                                                                                                                                                                                                                 |
|-----------|---------------------------------------------------------------------------------------------------------------------------------------------------------------------------------------------------------------------------------------------------------------------------------------------------------------------------------------------------------------------------------------------------------------------------------------------------------------------------------------------------------------------------------------------------------------------------------------------------------------------------------------------------------------------------------------------------------------------------------------------------------------------------------------------------------------------------------------------------------------------------------------------------------------------------------------------------------------------------------------------------------------------------------------------------------------------------------------------------------------------------------------------------------------------------------------------------------------------------------------------------------------------------------------------------------------------------------------------------------------------------------------------------------------------------------------------------------------------------------------------------------------------------------------------------------------------------------------------------------------------------------------------------------------------------------------------------------------------------------------------------------------------------------------------------------------------------------------------------------------------------------------------------------------------------------------------------------------------------------------------------------------------------------------------------------------------------------------------------------------------------------------------------------------------------------------------------------------------------------------------------------------------------------------------------------------------------------------------------------------------------------------------------------------------------------------------------------------------------------------------------------------------------------------------------------------------------------------------------------------------------------------------------------------------------------------------------------------------------------------------------------------------------------------------------------------------------------------------------------------------------------------------------------------------------------------------------------------------------------------------------------------------------------------------------------------------------------------------------------------------------------------------------------------------------------------------------|
| SmC4H1    | <p>TGTGAGTTAATGTTTTACCTTGGAATAAAAACAGCTACTTTTTTAAATAATAAACTCTCT<br/> GCCTGAATAAAGATTTGTGCAATATCCACACTTTTCTTCTTCAAATAAGCACCTTGTTT<br/> TGCTTTTGACTTTTTAAATTTGCATCGCAGTTTGAAAGAAGAAAAATAGACTGTTAGCT<br/> AGAAAGTGAACCTAACTTTACAAAATACTTGGAGGAAATGTCAGCGGAATTAGTTTA<br/> TCTCTTAAATAACATTTATACTACTCCATTTTTTATTTATTTTTTGTCTATCCTACTTATG<br/> ACGAAAATAGAAAAGTTAATTGTTATTTGAAGATGTGTTTGGTATAGATTTAATGTCGTA<br/> ATTCAGTTGCATTGAGTACTTTTGACTAAGTTTTGTTGAATAAATCCGACACATAAGATA<br/> TTGACGATGTTCTAGATTGGGCTAATTGTCCTAAATAGGAACTAGTACCCTAATTTGTAA<br/> TTACAATACAATTATCAAATATTCAAATTATAGACCATCTATTATTTTACAATTACACC<br/> ATTCCAAATTTTTTAAACAGACAAGACAAGCTATACTAAATTGGAACTATTAATAAAA<br/> AGATTGAATTATAATTACATTGTTTTGTGATTACAATTTATGATTAGTCTATGTTTTAAATA<br/> GTTGGCCCTTTCAAATAATGACGATCTCAACTACAACTTGTCAAAATCATGAGGTGG<br/> TTAGACATATATAGAAGGAGCATTTTACATATCAAATTCATGAGAGTGGCTCCAGAC<br/> ATAAATTTGAAAACAATTAATACCA<u>ACCTAA</u>TTATAAATGTGTAATTAATAAATACTTC<br/> AAATCTTGACTGGTTTAATCGTGAGAAGATTTACAAAACGTTGTGCTAGTATATGATATT<br/> GACTTAATATGTCTAGCGAACGACTAATTAAACTCAATTTTTTCAAATTGTTAATTTTATT<br/> ACTTATTGGCGTTTACCACGATTGATTATATGCATGATTGAGTATTTTTATTCTAAAGAGT<br/> AGGATTTCTCCAATTTACTTTTTCTATGGGATAAGAATCAAATAAAATTAGGTTGAATG<br/> ATAAAAATAATAAAGTATCTTAAAATATTTTCGAAGTTTCAATCCATTAATAATAAGACA<br/> TAGAGTCTATGTGTCTATGAAATGAACGACTTAAGAACGAGTAATAAATAATTAGATAA<br/> CTTCTTACAAATCCATCTCCAACCTACACGATACATTAAGTCCAATTTTCGTGAGTAAATG<br/> TATATCTCGGTAAGAGACAAAAGTTTTTTTTAATTTTTAAAATCAAATCTAGGTCNCTTT<br/> TTATAGTGTGTGCGCATTGTAATCGTGGTGCAGTAGTTGTCACAAATTTGTAAGGCGG<br/> GGAAGCACCGAATTTTTTTTTATCAAGAAATACACGTTTTTCATTGAGAGTTAGTTGTAG<br/> CACAAGCAATCCTACAACGTTTTTACAAAATATATCCATTATATAATACTCCCTTCGTCC<br/> ACCAAAGATATGCCACAATTTCTTTTTTCGTCCGTTACAAAAAATATATCACATTCATT<br/> TTTAGTAATAGAGTCTACACCATTTCATTACATTTAAAATGAGATCCTTACTCCACTAC<br/> CAACTTCACTCACATCTTATTAAAACTCGTGCCGAAAGTAAAGTGTGCATATTTTTTGTG<br/> GACGGAGGGAGTAGGTTATATTTTTCAAAGCCTCCAGCCATTCTATATCTGATGTGTCGT<br/> TCTCAATAATCTTCATTCTTTTTTCTAATTTCTACAATTATTCATTTTTAATAATTATTA<br/> ATATACATATATTTTAAAAACTTTCATTTTCAGTGTCTTTTATGTTTGTAAATTCACCTT<br/> TTGGAAAATGATTTCTTTAATTGTTATTATTCTAATTATTCATTAATATTTATCAATCAAAT<br/> AATTAATTAGCACGTTAATATTAATTACATTAATAAATTTTTATTTTCTATACTATTTTTTCA<br/> CTATAAATATAGAAATTTGCAACCAATTTTCATCCACATTAAGTTCTTTATGCATCTTCAT<br/> TCGCTTTTCTATCCAGCGACTCAAAATGCTATAATATATTGTATTATGTGGTAGCAAAT<br/> AAGATGATTCTAAAAGTCTCAAGAGAAAAAGAATTTTTTAAAATAAAGAAATCAAG<br/> GATTCTTATTGAATCAGAAGCTTCTCTCAACTTTTTTTTTTTTTTTTTTTTGGAGAGTGAA<br/> GCAGAACTCTTAGTTGCTTACATTGTAACGAAGTACTCCTTCCGTCTCAAGAAAAT<br/> TGCATATTTCTTTTTGAGTTATCCCAACGAAAGTGGTGCATTTTTTTATAGCAAAAATTA<br/> ATAAATTTAAAACTTAATTGACAAAATAAATGCACCCTTATTTTTTTTTAAATTAATTA<br/> AATTAACACACACTCTCTCTCTTCTATCTTCCCCATGTCTCTCTAAAACAATCCATTTGG<br/> ATGAAAGAACAAAAGCAGCCACCACCGTGGCCGCTGCCGCCCTCATCTCTGGCGC<br/> CTCCCCTGCCGTGCTGGAGCCGCGAGTTGACGTCGTCTTCCCCCGCCGTGCTAGGGT<br/> TTCGATTTGGGGTGGGTGCAGGGAGCAGTTGGGGATTGGGGCTTGGCGATGCCAGCG<br/> GCCTCAGCTACAGGTCACGGACGAGAAAGGTTAGAAAAGCAGATAAGGTGGTTTTTTG<br/> CGGCGATTTATCAAAAATCGAAAGAGAAGAAATTATGAAGTTTAAAAGTTAGGGAT<br/> TTTGTATATGTGTTTCGATTTGAGAGATTGTCATTTAAAGTAGCGGTGGCTGAAAGTG</p> |

GTGATGCGGCCGAAAATTTTGAAGAAGGGGGCATGACTGTGGTGGGGGTGGGTTTTG  
TGATGACGGCTGGGGTTTTGGGTGGTGGAAAGGAGGAAGACGGAAGGGCGTGGTTGG  
GATTTGATGGTGGTTGGTGGTGGTGGAGACGGAGGGTGGCGCTAGGGTCTTTTGTCTG  
GGCTGGGGATTTGGGGGTGGGAGGAGGCGTCGACGGTTCTAAATGGTGGGGGGAGGA  
AGATTATGGTGGCTGGGGAGGAGAGGTGGTGGTCTGGGGTTTTGGGGGTGGGGTTC  
AGGGGGTTTTGGGGGAGGGGGAGAGGGATGGATGGGGGGGTGTTTTTCAATTATTTTT  
AAATTAATTATTAATAAATCAAATTATTTAAAAATTAATCTGATCTTAAACTCTAGACG  
AAATGATGCTCAAACTCCAAACGAGATGATGCTCTTTCACGTTTCAAACAAGATGAT  
GCTCAAAAAGTTAGAGTTGATATGTCAAGTTTGAGACAAGATAATGCTCACAACTTGT  
GTCTTTAAACTCCAACTGATATGATGTTTCGATAACTCAGTTATGTCTTTTAAACATCA  
TACAATATGATTTTCATAATTAGTTATGATCTTACAAGTTCGAAATTATATGATACTCACA  
ATTCAATTATAATCTTTCAAACTCAGATAAAATTATGATCAAAAGGCAAATTAATAAAGA  
AAATGAACAAAATTAATAAATCTTGGAACACCAAATACAAACAATTCATTCTTAAAA  
ATGAAAGGATAATATATTATCCATTTTGAAGTGAAAATAAGGAAAGAAAAATGATAAAT  
TTATCTTTTATATAAAATATGGGGAAAAAAATAAAGTATTTATTTTTTCATGTTAAATTT  
ATCCATCAAAGTAATCGCACTCTTAGTTTGCAATAAACTATTTCAATCTATACTAATTGA  
AAAAGAGCCTAAGGCATCCTAAAGCACAACTTGTGAATTGCCTATTTTACCCCTATGTA  
TTAATTTTAAGGTTATTTTACATATTATATATTTATAAAAATTTATTAATTCATTAGATATT  
ACACTTAATTTATGTGATATATATCTATAAATATTGATAAGTCTTTATAAATAAATATATACA  
TTCAATAAATTATTAATAAAAGTAATGAATTAATAATTTTTTAAATAAATAAATTATCA  
AATAAATAATACTCCCCGTCGCCCAAGATGCAACATATTCCTTTTCGGGTCTGCC  
CAACGAAGATGCTACATTTCTATATTTGGCAAAAATGAGGAATTTAAACACTTAATTA  
ACACTAATTAAGTACTCCCTCCGTCCACTAATTGTTGGCATAGGAGGCAAAACACGGG  
TTTTAAGAATAAATGTATTTTATTAATAATTTTAAAAATAATAAATTATAATAAATAATAT  
TAATTACACCTACCATGTTATGCTAGTAATAATAACATCGTCTGGATCAAGATTTTAAAT  
TGAATGAAAAGGAGATGTGTTTCTCCTCATGGATGTCTGGATCAATTTCTCATGTAATT  
GTGTAACCTCCTCAGTACCTCTGGTACCAAATGTTTGAATATATCTTCTTTTTCAGATAA  
AAAAAAAAGTAATAATAACATCGTCTACCTTACAATTGTAAATACTAAATACCCAGGGA  
TAGTGTGCAATTAAGGCAAAAAGGATGGCTAATCTACAAATACCAGAAAAAGAGTTC  
CGTTGACGTGTGGCTCACCAAACCCGCCACCTACCCCGACGCCTTCTCCTCCTCCA  
CTTACCACACCATCCCACCGTAACTCTTGACGCCGTCAAAAACCCGTATCACCACC  
GGGCCCCACCTCCCGCACTCTCACCTAAAACGTCTCCACACACTATAAAATCCCCAA  
CCCCTCCGTTAAAGTGCTGCAGTTCCAAAAACCACCAACTCCCGCCATCACCACCGCC  
A

Sm4CL2

CCACGACGATCAAGAATCTTCTGTTGTTGAGATTCTCAGCAACTATATCAGCTAATTTAT  
GGTCCTCTTTGGCACGCGTTCTGTCTAGAGTGACATTTAAATCTTTGAGAATGTTT  
AGAAACATTTCTTTGTCTGTCAACTTTTGCAGACAGTAAGCCATATACGAGTGGGA  
AGTTGAAGCCGATATCTGGATCATTAATAAAGCTTCCATGCCAGCGTCGTCTTGCCAGC  
CCAAACATACCAATCACAGAAATCACATCAAATAGTCGGTGTCTTGCATCAAGCGATC  
TTAAGATCTTCCATCACATCTTTCGAAGCCAACCACATCTTCTTTCTTAGTGGCCGAAT  
CTGATTGAAAAGTAGTATAATTTAGGACACGGATTCACAGAGATATTGCATGAAATTA  
GAAGAATTACGGCTTTCTAAAATTCATCTATACTATTATAAAGAGCCTTGTTTTACA  
AAATTTAATGAAGTACAAGTCAACCTTTCTCCTAATTCCTACATGATTTGGGTGCAGCA  
GTTAGGCCTTGGCAAACAATTAATGTATCTAATGTTATGTTTATGTGGAACAAGGGTG  
GATTTCTCTAACTTTATATCAATTTTTCATAAGAAAGAATGTGAATTTCTCACCAACAA  
TGAGATCCAAGCACGCTACACGACTTCTCTCACAGTTGTGTTGTTATTGCAAATTCGGA  
GCTAAAAACATATCAACACTAACTAAACAGTCAAACACAAGATGAAAATTAATTATCT  
CGAATAAGTATCCCAATTCAGAATTTTATTATAAAAATGTTGTCAAACCTGTCATTTTCC  
TCGTCGTACCTTTCAATGCAATAAGTAGAGTACAATTTACTTTTTGTAAATAAAACATTG

AACTAATTAATAAAGTTACTTGGAAATTAGCTTTTTTAATATAAAATTTTTAAAGATTTTTAG  
ATGTCTTGACAAGACTGAGAAATCTATATATTATATAAAGAAGCAGTTTAAACGGAAAAA  
TGATTAATGTCAAATTTTTACCAGAATCTTATTAACTATTTAACGGCAGTTTACTCACATT  
ATTTATAGCAGTTTACTCACGTTAAATTAAC TTCATATGTATAATGTATCCACTAACCCA  
CAATGTTGACCAACTTAAAAGATAAATATAAAATTAACATGTATTTATTTATCTATCTAA  
GTGTCAGTTAGACACATACTTATCCACTACTCTAAAATTGACAATAAATAAAGC  
AATCAATTTATTATTTTTGAAAACAGGATCCTGCATCCCTAAAAAATAAATAAAGC  
AAAAAACCCAAAGGATCGTGCATGTACTACAAATTTGCATATTTTCATCAGTAACA  
TGCGTTTTTCAAACACAACTTGCATATAAATTTCAAAGATATATGCACCACCTCCA  
CATATATTTATGATATACTCAATATGTAACAAAACGTACACAAAATAAGTACTCCCTC  
CGTCCCATTAATAAAGACATAGGTCTTTTGGGCACGGAGATTAAGGAGAGGTAGATTAG  
AGAGTAAAGTAGGGTGCCCCACCTTCTTAGTGTATTTGATTAGTGATTGTTTTACTGTA  
TTTTAAGTGTTGCCACCGCCACCATCACTGCCGAACACCACCGCCGACCACCTGC  
ACTGCCGACAACACCGCCAACCACCTATCACCATAACNNNNNNNNNNNNNNNNNNNNNN  
NNNNNNNNNNNNNNNNNNNNNNNNNNNNNNNNNNNNNNNNNNNNNNNNNNNNNNNNNN  
NNNNNNNNNNNNNNNNNNNNNNNNNNNNNNNNNNNNNNNNNNNNNNNNNNNNNNNNNN  
NNNNNNNNNNNNNNNNNNNNNNCAAACATTAGATGTCTTCCGGGGTGGTTCAGACA  
AGATGATGCTCAGATGAAATAAAATCTTCAATATTAACCTTTTTCCAAAATATTACTCCC  
TCCGTCCCACTAGACTTGGCACACTTGCCTTTTTTGTTGTCCCACTAGAATTGGCACT  
TTCCTAAAATAGTATGTGGTCCCTACTTTCTCTACTCACATAAAATAAGTGGACCCTACC  
TACTTTACACTCTTAACCCTTATTCTTAATCTCCGTGCCCAACTCAAAGTGTGGGAC  
GGAGGGAGTATTAATAAAAATTTATATAAAACGAATGTTTATTATTCTAACTAAAGGTT  
AACATTTAATTGAGGAATATGATTCAGATTAATATAATTTCAACTAGATTACCTTAAATTA  
AATAAATTTAAAATAATTTATATATAAATAGTTATTTATAAAAAATAACACCCCCTTCCC  
CCAAAATTATGTATGAAAATTTGTAGTAATAATAGTGAAGAAAGGGTCTCACAGTGAGG  
GTATTGTTAAATAGATTATGAGTAAATAATATAAGTTCAATAGGTAAAATTGTAAAAATT  
ATATATGGGATAGTGTATAAAATAAGGTATATATAATTTTGGGGCCGTACCAATAAAA  
AAGGATATGCATAATTTAGAAAATGAAGGGAGTATCATATAATTTAATAATAATTTAA  
ATAAATTTCCGTCGGTTACGCACTAATTTACTAATTTGGAGTGAGACATGAATGTAGTA  
ATTCTCTATCGATATGTATGCATTAGATTAGGATATGAGGCAAATTTCACTATCTAGAGAA  
AGTAATGCCTACAAAAAAAAGCAAATATGCATATCCACAGTTCACGTTACGTTGATG  
AATGAGTTATGAATATTGGATCTAACACAACATACGACGTCGCCGTAGTAGGTAAGC  
GTCATCTTCCCAAATCCGACGTGTAATCATATTATGGAAAAGTCAATGTTCAAATAAC  
ATCTTTACCTAACATACATGGGTCCCACCCACGCTTTCTACCAACCACACTACAAAA  
TTTTCCCAAACCTCAATTCCTAATATACCCCTAAACAACCCAAAATCCCTACCAACTCC  
TCTCCCCTCCACCAACTCCTACCCATCAACCCCATATTTATACTCCAAATTGTTCACCCA  
TCATCTT**AGGTT**CAACTCTACAAAACTAAAGTTGATCCAAAAAAATTCCAATTCCC  
TTCCCAAAAAAGAAAAAGAAAAAATCCACTTCATTTCCAGCAATGGAGGTTCCAC  
GATGCCGGAAGAGATCGTATTCCGATCGAAGCTCCCCGACATATACATTCCGAAGCATC  
TCCCCTTACACTCATA

SmHPPR1

CCCATCACCACCTTCCACAATCAGTTGTGTTTTTTTTAAGTGAGGAGATGAAATGAT  
GTAAGAGAAGTTGTGGTCTAACAAGAAGCATCATATCAAGCTTGCGCAGCGCAGGAAT  
GTTTCATGTGCAGGTCGTTTCTCTGCCTCGTCGCCATCACCTGCAAAAACATGCATCATC  
ATCATCATCATCATCATCTCTGCTTTGTAGAGAGGGGAGGAGAGAGAGAGAGAAC  
CTCAAAGCTGGTTCCATCCTTATTCTTTTGTGTTGACAGCAACGAATTCGACAATGTGAT  
CAGTGACAGACAGCAGCCAGTCTATCTCCTTCTTCCACTTTGCTTTGGTGTGGGCGC  
CATCGGCTCCAATTTCTTCATCTCTCCGTATGCAGAAGCTGCATTTCAAAGAGATGATC  
AACAAGAAAACAAAGAACAATTTGATTTCTTCCAATAAATCTTGATTAATATTTACC  
TGCTAAGTTTGTGATTGCATTTGACAGTGCCAACGCCGATGAACTCCCTTCCCCCTAC

CCGACATGTCCTCGCCTAGTAGCAACTTGGCAAACCTTCTCCTTCATCAAATCCATATCTA  
TAAACACAACCTTGCCCACTTAATAACCTTATCATCTTCTAATTTCTTGCCAAATAAATTT  
TGGAGTCTTAATATCTCAACAAAATGATAAGGTGTTTCATATCATCGCAACCTTTCAAATG  
TTACGCCAAAATCACAAAATTGATGAAAGTTGGTGCATTAGGAAATTGTAATCATATAG  
ATAAAAATTGCGCGAATGTTCCGTGTAACAATGTTAAAATTGGTGTAAATCGTTTAAGG  
ACATAATAGTAAAAAATAACTACTATATTTTCGTTTTGCATATGAAAAAGGCTATAAAACA  
AAAATATGTTCTTGCCTGTAGGCATCTTCTGACTGGTGGGGGAGGGCTGGGGGGAGG  
CGTTCACTAGTCTTGGGGGTAGGGGCAGGGGTGGGGCTGGGGGTGGTGGCGGGGAG  
CGTGGCGGGGGCGGAGGCGGGGGTGGGGGCGCCATCGCTGCTGGTCCGGTTCATCTT  
GACGTTCTCAGTCCTGCTGAGAATGCCGCCTAGCTTGGTGAGCTGGACGGGGGGCGG  
AGCAGGCTCTTCGGGCAAGGGGGCGGAGGCGTTGCTCTTGGCCGTCATCCTCTCGTTG  
TCCTCGTCCGAGGGTAAGGGCGAGGCTGATCCATTGGTGGTGGTGTGTTGTTCGTTGA  
GGCTGCGCCGAACTTGCTGGCGCCACTCTCGAGCATGCCCTGAACCGCCCTAGCCT  
CGATGATCTCGAACTCTCTTGATCTTCAGCCTCCTCCATTGCTTTAACCATTATTGTGGC  
TCTACCTCAATGCCTCATTTTGAATCTAACAACATTCCCCTTCCAAACAAGGAGGTAT  
GAAACAGACTACAAAGGATTTGTTTTCTAGGAAAAATAGGTTTTTTTTGGGGGGTGT  
AGTTTTGATGAAGCATGAATCAATGTTGGAGGAATGTGGGGTGCATGCTGCCTGGGGG  
AATGAAAGAATTGGACGTTGGTTTTCTGTTTTTGGGAATGCTGTTTTTCTATCCCCTTCT  
GCTTTTTGGTATATTATTGGTATTTTTGTGTGTGTTAATTTTCGTCATTGGGCATTAAGGGA  
TTAACCACTAACACAAACGTGCCAAAATACACACACACGCACACATGCCAAAATTAG  
TTGATTTTTGGGTGGCTGCTATCGTTGTTAATTGTATTCTTCTTTTTATGCTATATATAT  
TATGGTATTTAGACCTAATTAATCTATCGAGTTTTACTTTTTAAAGTGTGCGGGTATTATAA  
CCAGTATAAGGACAAATTAGGTAGAGCATAACTAATAGGGAAAATCACAGTTTTATATC  
CTAAATTAATGGCTATTTAGTAAAAATATTTGAACTATCGAGAACTACAATAAAATACA  
TGAATTATTCAAAAGTATCTCCAACCTATGGATAATTATAATAAAATGTAAAAATAATCTG  
AAAATAACTCTTATTATTAATTTTTAATTAGTTATTCCAAGCTGTCCAAAAGCTCA  
ACGTTTTCAATTTATTTTTACGAAGTGAAAGAAATAGAATATTTTATGAAGTGTTCAAATAT  
TGACTAGACGTCAAAGACTCAAAGACACGCTTGAGTTGAACAATTTCTTTGAATTTG  
GAATATTTCAATGTCAGGCCTTACATAAGGACATGCTCAACATGCTATCGCATAGGGCCC  
CAAATTTTTGGAGGCCCAATTTTTTTTTATATATATACTCTCTTTATATATATAAATTATTTT  
TTTTAAATATGAGTGAAGTTGTATAAATCCTACTATTATAAATGAAAGTGATATAATATTTT  
CATGAACGAATTTAAAAAAATTGCGGTAATTTTTTTGTGGATAAAAAACAATTAAT  
TTAAACAATATTAATTCAAAAGTATATTGAAACAATATAAAATAGTAGAAAAAATTA  
CCAAATTTATTCATGAAACCGGTCACTATCTCATAGGGCCCTAAGCAAAAATTA  
ATGGGTCTTATAATTTCTTTTATATTGATGAAACAATAATAATAATATATTAATATAAATT  
TTTCAACTAATTTAAAAGAGTTTTCAACCAAAAGAAAATAAATAAAAAATAAATTT  
TATATCATTTACAATATAATAAATAATTTTTTCGTGGACAAAAAAAAGTATATATCAAATT  
TAAAAGGAAACATCATCTGCAGTGCCTAAATTGGCCGGTGGCCACCTAACCGAAAATC  
GCCACCACCAACCACAACCGGATATTAACACTAGTTCTTTATTAGATATAAGTCTATA  
ACAAATTAACAATACAGCTATAAGTCTTCTTTTCTTCTTTTCCAGTTCTTGGTGGAGCC  
TCAATATCTATATATACACATAGCAACTCATTTACTCTATGCTAATATGAATTTAATTTT  
AAGTTATATGCCTGTTACATAAATATCATAAATCATTAAATAATTAATTAATATCATAA  
ATCTGATGAAATTGAAATTTTATTGAAATCTGTCAACTCTATTTTTGGTGTCTTTTAAATA  
AAATAACGACAAGACAAAATAAAGTGATCTCACACCAAATAAATACTCAATTAATACT  
ACATACTTATATGTTTTGTTTCAGAAAAATGTTGAACTCTTTTATTTAACCTAGCTTTTTT  
TCTGACAATTTATCATTGACCTGTAATGCGAAGGAAAAAAAAAAAAACAAGTCTC  
AAATTTATGAAAAAATGGTAAGGTGAGCCAAGAATTCGTAATTTTATTGATGCAA  
GGTATAAATGGTATTTAAAAAAGAAAGATGTGATATTTCTTGTTATATAGAAGGTG  
TCATGAAAATAAGAATGAAAGGAATTGTAATTTTTTTTTTCAAATGAAGGAGATTGA

GATATTTGATCTCTATAACTATAAACAACGAAATATATCTACCTAATCATGTTGTATATATT  
CTCAATTTAATAAAGATTAAAAATAATTAATAATATTAATAATTATAACATTATATATCTAA  
TTAATCATTTTATAAAAATTCCTCCAGTGGTAATTAATAACTTTTAAATAAATTTCTCAA  
TTTCTTAATAAAAATACAACAATTTATTTGACCAACTAATGAATAAATTGATCAAATTA  
ATTAATGATGCAAATAATGATGAAATCAAATAAAAGCGCTTGGCCGTCATGAAGC  
ATGTGACCCAGTTCTTTTTAGCACGAGAATTAAGAAATTAATATTTACTATGTGTAAA  
TGTGGTAGGTGAAAAAATGAAAATGTAAATAAATTGTAAATTTTTTTGGCATTTTTAAA  
AACATGTCAAGTTTTGTGGGACAAACCTAAAAAGAACTGAATCATGCTGCGTGGGA  
CGGAGGGAGTATTTGGAGCATGGAAAAATAATTTATCCACGTTTAAATACAAATCTTT  
CCTTGATTAATTAATGATTGATTTAACCTAATCATTGTGAAACCAACCCTAGTGTAC  
AAAACCAGAGTCATTGACTCACGACGGCCGAAAAATGGTAGCCACAATCTGGCGCCG  
AGCCGCGCCGCATCTCAGCCGTGCATCACTTTCACGTGCTGCCTGCTCTATATTAACCA  
ACCGTCCCACAATTTCTCAACC

SmDFR

AAAATTTGTACCACCCTTCCTTAGGACATATTTTCGTGAACGGAGTGAGTATATAATTTTC  
AAAAAATTGAATTTGTTTATGTCTAATTTATAGTATTAACCTTTAAAGTTCATTATTTCCA  
AATATATATTTTTCTTAAATGAATGAATGTCAAAGCTAGATTATTGAGTGAAACTCATG  
TGTTCAAGACGAGGTCCAGTCAATTGGCTTAAACGTGTGAAAATAAATTAGCTCTTTATC  
TTCCACACACAATAAATAAAGCCAATCATCATCATACTGTTACAACTTACAGATATGGT  
CGGTCGTATCATTAAATAAAATAAAATAAAGAATTAGACCAGTCCACCTATTTTTTC  
CTCTTTCAATTTAGATTCTACACCCCTTCGCAATATTAGTGCTAGTGCATTGTGATATT  
CTAATTTAAATTTGTGGATATTATCCAAAATACGTTTACGAGCAGTGAACATTTAGAAG  
GTGGGAGAAATTGAAATAATAGTGATTAAGAGATGATCGAATCTCATCGTGTTTTAT  
TCTCCCTTACCAAAGAAAATGATTGATAACCACTAGGTCCACTATGTTATTAAAGTTTG  
AAAAAATGGGTTGCTCTTCTTAAACCACACATACCTCCCATTCAATGCAACTTATA  
GAAACAAAAGTCCAAATCAAAAACCAAGGATACAGTGAACCTAGGAAATAATAATTGT  
GACAATAACAATCACCCAAAAAATTTAAAAGTGAGAATGAGTATGTGAGTGGTCGAAA  
CATATATTTGAAGCTAGCTAATTAACCTGAAAAACAATATTGATAGAAAATATTATGATT  
ATGTATAATACATAACAGGCTTGTGTTGCGGCCATGTCCCATGCTCCTCCTTCCTTGACAT  
ACTCCAAATACCTCGAGAATTCGGCTTCGCCGTCGCCTTCTCCTCCGCTTCGTCTCG  
AAAATACTGAAAAAGGGGTGAACTTTGCCAGCCTTCTTCGCTTCTTTCGCCGCCGCGG  
TAGCTATCCTTTTCGGAGAGCTGTTCACTTTTCGTGGTAGGCAAGCTTTTCGTTCTGCTC  
AACTTAGGCACCAACGACGCCTCGTCTCCGTCGCCAGCTGCTCATAGCCCCGCCGGT  
TCCGCCGTATGCTCAGACCTCTAAACATTGACCTTTATCAACGGTTATGATGAGAGTGA  
AGATAGGTTTTTGGCGATGAGGCTGTTTCTATATATGATAGCATCTTACTATTTTTTTA  
TGTTTCTTAATTTCTGATTATAGTAGTCATGTTTTGACCTTTCTTTGGCTTACTAAGTAA  
TCATTATTTATAGTAGGTATATATCGACTGATTCTTCTACTTACGAGTATAATTTAATCTC  
CTCATCCATTCTTTAATTAATGTAAATGTGATAAATTATTGTCTGGTGGGACCCATGA  
AATTGTGTAATAATGCCGATCAGAGTGGATATTCTTCTAAACAGAGAGTTCGAATTTTG  
AGTTTTATGATATTGAGCTTAATGCATACGATTCAACAATTCAATCTTCTATTTTATAATT  
GTATCATATATCTCTTACATATAACAACGAAGGATTCTAATATATTAATCATGTCGAAAAC  
TCTATAATTAACAAGTGTTAAAAAATGCAATTGAATGGGGATAGCGTACAATCACCATG  
ACTAATAAAATATGGAGTAGTACTTAAAAATGAATAATAGAAAGAGTTGGGTACATGAT  
TTGCAGGCTGAGTTTTCTTTGTTGACTTATTGGTGGTGAGCCATCCATCCCCACGCTT  
GAAGAGTGAGTGAGTCCATACCAATAATTGGACCAAAATGGTTTACTATTTTTATTAGAAT  
TTTAGTGCATTAATTAATCACAAAAGACGTAAAACATGCTCAATCATGCGAAATGTTA  
TTAAAATAAAGAATACGTGAAAATATTTTTCTTCTGACAAGAAAAATAATTTAAATAA  
CTACTATTTGTGTTTCGTGTGAGAAAAGTAAAACCTGAAGTAATAATTATTTGTTAGCTAC  
TAACGTTTGAAGAACTACTTTAACAGCAAATTTGGGTGCGTGAATGGGTGAATG  
GTGAGTAAAGTCACGTGGTTATACAACAACTATGTGGATTGTGATATATGGCATGTTAT

AAATGAAACAATCTTGTTACCATTTTTGGATATATCCCAAGATTCACTGCATCAAATCA  
CTTTGTAAAA

SmDXR

TCCCATCTCTACAGTGCCTAAGCATTATCTGGTTAAAAAAATTCCATTACCCAGTTAGA  
CTAGCAATAACTAATTAATAAAATTCATTACCCAGCGGTTCGCTGGGCTTCAGCGAG  
GGCTGGGCCTCCGCGCTCGCGTGAAGCCAGCGCCCGCGCGGTCTCCACGCCCGCTGG  
CTTTCAGGATTTGAAATCCGATAAAATCAATGAAAAATTCCTGCTAATTCACCTAAAT  
CCGAGCAAGAATTCCTTCAAATCATGAAGAATCCACGAGACTTCTATAGACTTTTTAAA  
ATCCACGAACCTTTTAAAATCTACACAAGTCTTGAACGAATACACCCCCCTAAATGAGTC  
TACACATCTTTACAATCTTACTCTCGTAAACAAATGTGTGCGAAAAGAAGTAGGTAAAG  
**TCAACTG**AGGCGGAGAGAGTACTAACTAACAATAATTAATAATACTCCCTCTATCCA  
TAAAACATCTTCTATTTTATTTTCATCCATCCACACAATATCTTCTACTCTTTTTTTGGGA  
CATAATCTCACTAATTATTTTCTTAAAATTTTCACTTATTTAGACATATTATCACTAATTA  
ATCCACATAAATATATGTAATTATCACTATTTGTTTAAAATTTATGAAACTCTTTATTCACT  
TATCAAATATATAGTTAATTTTTTTTAAACGGATATTCAAAATTTGAAAGAAGAAATTTT  
GTGAACGGAATGAGTATATAATATTGAAAATTTTCGACTACAAAGTGCCCATTCGCGAT  
TCACTGTGAAAGTAGCCGAAAATTTGTTATCGTAGCGTGGGAAGAAAATATAATAAAC  
AAGTATTTGTTGGACTTAGATTTGATTATAAGAGAATGCTATTTCAAAGTAAGGGGAA  
TCAAATGATCTTATTCCATGAATTCCTTCAAATCTTGAACCTTTATCTCAATTTTTTTGGGA  
GGGATTCTCTCAATTAATTTAAAACAAACGATAGAAAAGAATTATTGTCTAATGTAAAA  
GGGTATAAGAGGGAATAAAAGAACAAACCGAAAGATATAATAACTTGCATAATTTTATA  
TTATCTAAGACTAAACACATTTAAATGCACAATTATTTAAGAAAAGGGCATTTTAGGG  
AGGGAGAGGGAGCATAAACTAAAAACAATACCCCATATAGGCCACAGTTGTATTAA  
GATACCTCAATTTGTCTCATTGCTAAAATTTTCTTACCTATCACCAATTTTCAGCTTT  
GTTACCACAAATTATTCAAGTATAAATAAATGAATGGTAGACTGTAGTTAATAATCACG  
TTATTGTAATAAACTCATATTTAATTTTTCTTATCGAAATAACCTTATATACTTTTTCTCTA  
TATAAAGCAATTCGATATAGTAAACCAAAAAACAATGACAAAATAATTTATAATAGGG  
GTTATTGCCGTTAAATACATCAAGTTTGTCAATTTTCTGGTTTATATCATCACCTTTTTTT  
TGCCAAAAAATACATGAATTTGTAATTTGTTCTGAATTTGCCACCATTATAATTCGC  
CCAAATTAATCTGAGGTGGCAGTCGAATTGCCAACGTGACAGTCGGAATTGTCAAGGT  
GGCTGCCGGAATTGCCAAATCACACACTTCTCTCTCTATCTCTCTATCTCTCTCTCTC  
TCTCTCTCTCTCTCTCTCACACACACACACACAATTACAGCCGCATTTTCGCACCT  
CCTCCACCTTCCGCCGCAATTCCTCCGACGCCATCAGCCTCCTCACCACCACACCCAC  
CCTTCCCCCTTACC GCCCTCCTCCACCAATAAAGCCACCCGATTCCTCCACTAGCAGA  
GCACCCCTCCGCCGCCAGTAGAGCCTCCCCCTTCGCCGCCCTCCTCCACCAACAG  
AGCCCCCTCCGCCGCCAGCAGAGCCTCCCCCTTTGCCACCCTCCCCACCAACA  
GACCATCTTCTCCTCCAGTCTCTCTCCCTAGACAAAACCAAACTCGAATTTACCAT  
GCTCAATTATAGATCTACAAACTCAAATTTGCATAATTCAAACAAAATTTGGAAGAAT  
TTGGCACTCAACAAGATCTGCAAATTCGAAGACTTCGGGTGCAGGCGGCAAAGATCG  
AGAGGGGACTAGGGCTCTACTTTGGGTGAAGGCGGGGGAAGGGGGAAGTGGTGGCG  
GTGGGGTTGGGGGAAGGGGGAGGCTCCGCCGGGTGGAGAAGTGGTGGCAGGCGGGA  
GGGTAGGGAAGGGGGTACGGTCTCGACGGGGAGGGGGGAAGGGGTGAAAGGTGGGG  
CTGGGAGGGGAAGTGGTGGCGGGGTTGGGGAAGGGAGGCTCCGCCGGGCTGAGA  
AGTGACGGCGGGGGGTAGGGGGGGGACGGTCTTTTGGTTGGGGATGGGGTAGGGG  
GATGGGATAGGGAGGTGGCAGGTGTGGGGGGTGGGGAGGTGGCAACACATCATCATT  
CTCATATAAATTAATGCCACGTTTCGTGCCACATAAGTCACGTAAATGACACATAAGTTT  
CGATTTACCGGAGTTACTCACCTGTGATATTTAAGAATCAATCTTAAATTCGTGTATT  
TAATGGCAANAAAAAAGTGATGATATAAATCAGAAAATTGACAACTTGATGTATTTT  
ACGGCAATAACCCCTTTTACAAA**ACCTA**ATTTCCCCCATGATCCAGTACAAGTGACA  
ACTACGAAGAACGAGGCAATTTGCCTTAAAATCTAGCTTTAATGATAATTTATGGTGAA



TATTGTATACTAAATCTGCATGAAGTATTAATCCTAGAAATTGATGTCATTTTCATTTTA  
AATTTTCACGGCCGAATCCTTATAAAATAGAGCCCAACAGTCATTATTATTGTACACAAT  
CTCCCTCCTATTTCCCTCTCTCTCTCTCTCTCCGTCATTTAGTTTGTAGTTTGCCA  
TCCTTGACCAGCTCGAAATTACAGTGTTGCTCGCTACTTATATTTTCAGGTTTCTCGAAAT  
AAAGGAGTCTAAAAAAGAAAGCACCTTTTTAATTCAATCTTCAGCTTTCTGTGCATTC  
GAGCGTGGATAAGCC

SmMCT

GGAAATACTATCCCGAACTTGAAAATTTTTGGGTCTTCGAAACCCTCAACATACTATAC  
ATAAGAAAACCTTATGTTTCGCAACAGCAAGCTAAAAGCTTCATCTTTGGGTCCCATGTTT  
TAGACTCGTGTTCGAATGCTCAACATTTTTCAACTCTCCTCTCATGTTGCAGTAGTGG  
TGCGGAGTATTATCCCGCCTATCCTTCACATCACACTCTTGATGACATCTTTGAGGCAT  
TTTGAAATCACAAAAGGAAAACCTCAACTCGACCAACGCTCTAAGCATCCTCGAAACTT  
GATAAACATGCATTTTTACCTCATGGTGTGTCAATTTTTGATGTTTAGTTATGAGGATTTG  
TGTGCTTGTGATTTATTTGAGCTTATATTGGTTTTTGGTCAAGAACTTGTCACCTTGCTT  
GTGTTTGAACGTATTTTTCAGAAATAAAGAAGCAGAATTTGAAATATTTGGCTGAAATA  
GAAGTTGTAGTTCGTCTCGATAGGAGTTCGTGAGAGCAAACGGTTCGTAAATCGGAGT  
TCGGACGAGGGAGAACGAGCCAAAACAATCACTGCGCAAGGCCGCGGAGGTCGC  
GCGATCCAGGCGCGCGGCCGCGGACCCAGCCGCGGACGAAGACAGAACTGCTGG  
ACAGCGCGCGGGCGCGGACCTGGCCGCGGAGACGCCGTTTTTCCGCCCAAAT  
TCGTTTTTTTAGTGATTTTGGGTATTTTGGAGCTACAAGACCTAGGGCATATAAATAC  
TCCCAAGAACTTATTCTCAGAACCTTTATCACTTTTATCATATTTGACTTTTCCTGAG  
AGCTGAGAGGCGACGGAGCAAGAGCAAACTGAAGAATCTCGATTCTCTACGGTTTC  
ATTGTTGAATGTTCAACAATTTTATTGAGATAGTGATTGTTAGTCATATGTCTATGTGTGG  
CTAAATCCCTTTTCCAGGGTTTAGGGAGTAAACATGATTCAAATTTCTGACTGTTGAT  
TTAATTAATTGAGATTGATATTCCTTTCTATGTTCTTGTATAATTGCTTGCTTTATTGATT  
GACCACCAATTTAGCATAATCATAGGTTTTAATTGAGATCGGGAGATGATAATTAATACC  
TGAACTAAGAACATAGAACACATTTATTTAATTCTAAAGGGAATTAATAATTGTGAAGG  
CGTTAATCCTAGGTAACCTTAGGAGTTACATGTTAGAAGTGCATCCGGGACGGTAGCC  
TTGCATGTAATCAACGGTTTGTATGCCACGGGAGTGGGTATAAACTAGCTTAGAGATTG  
CCTTAGGAATCATCTTATTAATTGAATCAAACATGTTAGTTAGGAGAATCTGTTGAAACC  
TTTGCTTGGGAAATCTCCTCCTTCTGTTACTTCGTTTACAGCTTGATTTATTTCTGCT  
TGCTGTATATTAATTTTGTGTTTACAAAAAACACTCAAATTCGGTTGTCCAGATAG  
AGTAAAATAATTAAGAATAGGAATTGATAAAATCAATCCCTGTGGATACGACCTGTCAC  
TACTATACACAATTGCACCCGTACACTTGCGGCGTGTTAAAAAAAATAGCGAACAAAA  
CTCAAGTTCAACTCACTAACTCAACTCTAAGGAAACCCTCACGGTCACCTTAACATTC  
ATCTATAAGGCAATAAGCGCTCACGAATTGCTAACAAAAAGACCACTCTGGTCAACCA  
AATATATCCATCAGTAGAATGCCTCTTCTTAGAGGACTTACATAAATGGGTTCATATAAT  
CCTACGAAGACCATAGTATCTATCGTGATGTCCTTTCTAAGCCAACACCATTAATAGTAC  
AATGTCTCGGTCTGGACCTCCTACGGTAATTGCTACCAGTTAATTCATCTAGTTGCTACT  
TTAGCACACTAGGAACATCCATCTATCTAACATCAGTAGGGTACTATATTCGTATGCTTAT  
CTATCAGCATGTCAAAGCTCAAGTACCAGTATCTCCTAAGTAAGTTAAATACATTGCA  
ATGTAATTGAAAACATAAACAAGGGTGTACCGCTCATAACCTCAAGATCATCCT  
TAGCTCTTACCCTCAAGATCATCCTTAGCTCTAGCCTACATCGGCTCCTCTTCTCATCCT  
CATCAACTCTAGCCTTCTCGGCTCTTTCTTATCATCCTTATCATTATCATCTTATCATCT  
TCGGTAACTGATACTCAAGGATCGACTCGCTATTTACTACACTCTCCTGGAGCCCCTAG  
TAGAAAACAGGCATCCGGTCAGTAAGTCCGCATAGAAAATCTGGGTATCTGTAACAAA  
TCCCATCTCCTGTGGGTCCAGCGCTCGAAACGACACGTCCCATCATATCGAGAGGCTTT  
ATCCCTTGCTCAATCCTACCACTCGATTGGTAGCACGGGGACCAGGTTACGATGTCAT  
CCAGTCTAGTAACAACCATAAGGCTTTCATCATTTTCATAGTCTATGGACATGTGTTTGA  
AATCTGCTAGGGTATCTCTGTATTACATACTGTACGCCTCGTCTCGTATCAGATCTTCC

CTGAGTTCGATCTCACAGCAGTCCACTTTTCGTGCAGTGCCAACAGTCCTGGCCAACCT  
ATAAGGAGAACTTAGAGGTGTCTCTGGGAACTAACTCTACTCGACTCAAGCAACAACA  
ATAAGCAAACATAACTTAGCAAACCTCCTACTAAGTAGTACTGTTCTCTTAAACTCA  
AGCTCAAATATCTAAATTCTCATCTCGTCCCATCTTTACATTTCAAATAATTATCTCGAA  
TTATTCAAATACTCAAACCTCAATTACGGATATAAAATCCCACATCATCCTCACATAATCA  
AAAGAATATCTCAACATCTTTAAATATAACAAGAAAACCTCATATAACTCCTTGTCTCT  
ATACAAAGTAATCAAACAAGGGATCTATAACCCTAATTACTCAAACCTCAAGCAATTAAC  
ACGTCATCAAAGCCCGGGTATTACACAAACACATGCAGAGTTAATATTAGCTTGTGCT  
GGATTACACAACCTTTCTTTGGAAAGAATGTCGTTTCAGATAAAATTTCCAATTGAATATGA  
AGAAGATCAAGCTTCACCACATCTTGAC

SmCMK

CTTATCCACCAGAGGAATGGCTCTTGCCAGAGGAATCATGTGCGCCAAAGAAATCACC  
CTTGCCAGAGAAGTCATCTCCACCAGAGGAACTACATCCGTCAGAGAAGCTGCTCTCG  
CCAGAGGAATGCTCTTCAACAGCGGAATCACTAGAAAAGCGCGGGGAGGTCTCCCGCG  
CGACGGCAAAGTTACCATTCTACCCTCAAACACGCAAGGCGTATGCACCACAGACGA  
GTTTACCGTTTTACCCTCCATTTTGTAACTATAAATAGGCCATGCGTGCTCCCCTGTACT  
CTACGCTATCTTATTTTCGAATACAGCAGTGATTTCTTCTCGTGTTCTAGCTTTCCG  
ATTGTTTTTCTTCGTCTTCTTCAGCTAATCAAACCTAGGTATAATTTATGATTGTCGTTTTA  
GCTTAGGTGTTGGTCTTTGATTCACCACATACTTTCTTCCAAATGTTAAGAGTTCAAATC  
CTATTACTTACATCCTATAAAATTTGATTTTTTTTTAAATTTAACCGGTTATCGGTTAACC  
GAATTAACCAATTAACCGATTAATTCGAAAAAATTTAGAAATTGAATTATTCACCGGTTA  
ATACGGTTGACTGAATAATCGGACCGGTTATTCGGTTTAACTGGTTCCGGTTACCGATTAT  
AAGAATGGGGCTTATTACCAGCCGGTTAATACGGTTGACTGAATAACCGAACCAGACC  
GATTACCAGCCCTATAAGGGAAATAATGCATGAACATTTATATAATTAGGAGAAGGATTT  
TATTTTTGACAGTCAGTTGAATTGGCTATTAGCCCGTGATTAACCGCCAGTTCGTGAGC  
TCAAATTTCAAATGTATTGACCTTTCTTATGATGGTTTCGGTTTAGGGCTGACTGTGTC  
ACGGTTCTGAGCCCAAACCGTTGATCGACGTCGGTTTCGGGTCAAACCGCTAGTTTC  
GGTTAATTTGAACATTTCTAATTTCCACTACCCATAAGAAAAGAATACTCTAAAATAATT  
CATTTTATTTATAATTTTATCATCAACATGACAATATGAACACTAATTTAGGGTTAAATTC  
ATTCTTTGAAAAATGATGAAATAATTTACAAATAATTTAATTGGTTATCGGATATTAATAA  
TTAAGCAAACCTAATCAATAGATAAATTATCTTGTTCCTGGAAAATAGTCCATTTTGC  
CATTTTAGTACGTTTACAAAAAATATAGTTCTTTTTTTATTTATAAACACTATCTCACAACA  
TATTATTTCAATATATCAACTTACGTATATTCTACCATATGATGGGTGAAAAACTTGAA  
CCCGTGAACCCACGGTTAACCGGAACCACCGTTTAAACAAGGGCTGGTTATAGTTTCGAA  
TAACTTGAGCCTGTGAACCCGCAATTAGCCGGCAGGCTGAACCGTTAGTTCAGAGGGG  
CTACCAAATAGATCCCTTCTCCTAATTATATAACTGTCTCTGTATTATTTCCCTTGCATC  
AATACTGTGGCCCAAGCCCAACACGCTCCACACTACAAAACCTAACCCTAACCGTAAT  
GTCCATATTCCTCTGAGAATCAGCTGCACACACATCACACAATCAATTCAACTACACAC  
ACTGACACATATACTGCACGCGCGGCACACACACACACACACACGACCGTGGCAA  
AGGTGGGGTGGTCGCGCGGCAGCGTCGGATGTGGGGTGAAGGCGGAGGCGGAGAC  
GCCGAAGAGAGATTGAAGATAGGCAAGATGGAGAGAGAGAGCATAGAGAGGCCAAA  
GGCCATGAAAGACCGCTATTGAGACATGCTTGCCGCTTTCAAATTAATATTAAAAAAA  
TAAAAAAATCATAGATTTGGGCTTGAATCGGCCCCAGGACTACCAGTTTGGGCCAG  
CCTTAAACCGTATATCTTATCCCTTATCGGTAAACCGTGAACCTGCTAGTTCAGGCCCGA  
AATTGGCGGTTCCCAGTCCATAGACAACACTAATAATAATAATAATTTATTTATTTAT  
TTTATTTTTATAAAAAATATCGAGACTAAATTTTATTTTATTTTACAGAAAATTATTTAAA  
TATACAATCGTTAGTGATTAAGTTTTTGTTTTTATTCTTTTACCGAAAAACCAATAGG  
TAAACATTGCATGAAAAACGTTTAGATGGTGAACACGAAGTCTTTGTGTATAATTTAG  
TAATTATCTTGCACCAATAATTAATTAATCATGCTCAATAATCAACAAAGAAAATTTAAA  
AAGATATATATAGTCGCGCTTGGGATTAATAATAATAATAAAACGCACACCATAGAAG

AATGAAGAATGGTGC**AACTGCAATCAGTAAAATCGCTGACCAATGCAA**AAGGACTCT  
CTCTCTCTCTGGTCTAAACATAGGCAGCAGCAAGAAAATTTATGTTGGTTTTGAATA  
AGTTTGAATTGCGGAATCTTTAATCTGCCAAATATTGAATGCTATTTATTCCACATTTACC  
ATAATTTTAGTGTAGCAGTCAGTCA

SmGGPPS1

GTACGTCATCCAAATTTATGCACACTCTATTTTTGGACACTACCCACACACAATTTTCA  
CAATTTTATTCTTATAACATATACTATTTACCCACAATCTACTTAAACAATACTGTCAATGT  
AGCATTCTCTCTCCACTATCAATACTTCAAACAACCTTTTTATTAAAACTCATGTCATGGT  
CAACTATGCATATTTATTGGGGACGGTGGGAAATTTATTATCTTACGAATCAATGCTATG  
GGACATTTTCTTTATATTATACACAACACTACTAATATTTTTTTTTCTTAAAATCCGTGTCCGT  
CCTTCCATCCACATCATATTTATTGTGGAGGGATGAAGTACCATATTTGACTAATTAATTA  
TTAGAGAATATGCATTGATTTATTTTTGGATAACTTAATTTTATTAAATTAGTCATCACCT  
TAGTAAATTGGAGGGCGGAGTTGCTGCAAAGTGCAAACCTCGAACAAACATTTAAACTA  
AAATAATCTAAAACCAAACACTCACCATCCCAAGTTAGAAGAAGCAGAGGGCGCCCA  
GAAAAATTAATAATAATAATTTTATCACTTCAAACAGGATTCATACCTTCACCCAAATA  
ATTTCTTTTTGATTTTTTCATATTTATCAATGAAATGATATTTAATAATTTTGGTGTGCATT  
TTATGATTATTTCAATATAATTATGTCGTGTCTTTCTATAGAATATAATTGTTTCATAATTTT  
AATCCATAAAATATTGTGTCTTATCTTCATTAGTATAGAATATCATATATTTCAATATAATT  
ATGGAATGAAGAATAATTGATAATTAAGGAAGAGATAATAAATCCAAAATACTTTAGGG  
GTATTTTAGTCATAAATATTTTCATATAATTAAGGGGCCGTTTGATTACAGTTTAGG  
ATTGATTAGGATTAATAATTATCTTGAGAAATTAGTGTGGATTAGTGTGGATTTATATTATT  
TCATGGGTGTTTGATATCATGGCTACTTAATCCTATATTGTTTGATATTCATAGGATTATGT  
TGGATTATATTATCTAATACCAAACACTATCCTCATATAATTTAAAAATATCATGTCTGTCC  
ACCATTACTTGGGCATTTGCATCGATATGCGTGAGGAAGGGTAGCAGAATTTTATCCA  
ACTTCGCAGTATTAAGTTATCCGAGGGGGAGGGGCCGATTATTAGTATGGGTATTTC  
CCACAAAATAGCATGGAGAAGTGGGATTAAGTAGGAGTTGACCACATTAATAGAACAT  
GATATCAAATATCACACTAACCTGTATTAATTTAATTTATCCTACCTATAAACCCATATCA  
AACATGCCCTAAGGGTATTATTGCAGCCATAATTATGCCCATATAATTTCCATCCTATAA  
TTAGTATTCAAATTTCCAATATTGATGACAAATGCCTCGTGTTAGGACCATTGACTATGGA  
AATAAATGGAAATTTGTGAGACTCTTACTTGCAGAAAATTTTCATTGATTAAGTTGTCG  
TCTATTGTATACTATCGTTAGTCGGTCTATTTCCGGCTGTGTTAAAAACATGGATTCCAAG  
TCAAAAATATAAAAATAAAAATAAAGTAAAGAAAACCTAGGATTCATTCAACTTATATACTTA  
TATACCATTGACTTAATACTAATTTTCATGCTAATATATTTGTTGTTCAATTTTGATGACT  
GCCGATTATTTTGTACATATATTAATCGTTTGATGACTAAATTTATTTATCTTATATATATTT  
AAAATCGTTACGGTCATACCACGGAAACAAGAGGTTGATTTCAAATTAACGATTACT  
TGTAGACGCAGCTAGCTCATTACACGTGTCCTGGCTGACTTTGAATTAATTA AAAACAT  
GGGAGAAAATTTACCAAACACTACAGAAAAT**TAGGTT**ACTATCGAAAAAGTTGGTTG  
TTGAGAATTTTGTGGATTTACAGCATTGGCGTAATTGAGCTGAGCCACTAAGTAGAA  
AACTATTCTAAATTTGGTTCAATTAATGTTCAACACGTTCACTGTATTA AAATATATTTT  
ATCTATTATCAATTGAATTATTTTATTTATATATTCTAAGTCGAGTAATCATTAAAGTTAAG  
TAATATTTAAGTATCTTTTAACTATATTTAGTCAGTATTTTAACTCCGCTGAGCTCGCTT  
AAGTTAATGAGTCAACCTTGGATCTTTTTTTTTTTTTTTGTTTGCCTCCATAATTATATTA  
TCTTTTTGAGTGAGAAACGAAGGGTAGAAGATCAAATAAAATACTTCGTTTTCACAGT  
ATGCAAATCTAAAATCATGAATCATTATATAATCCATGATTATCATCTAAAATTTGTA  
TTATTGCATATTTGCCTCTAAAATAATTACAAAATAATCAATAATAAGTATTGAAATGTA  
TATAAGGTGAAAGTAAAGATTTTTAACCTGATTATTTTTAGGTGATATGAGGGATTGAA  
CCGAAAATCTCTTTATTTTATACAAGGAATGAGCCATCGATTTAGTTGAAGGAACACTG  
TGAGAAATATACTCCATCCTCACTACTAAAAGTGATTTGTATTTCGATTTTAGATTATCAC  
ATTATAAGTGATTTGTTTTTACAAACGAAAATTTTTAACTCATACTATAAACAAGTGTA  
GTCTTATCATTTTTAATCACTTTACATATATTTTATGTAATAAAGGGAGGAGGGAGTATAA

TCTAAACCAATTAATCTTACCACATTTACCGTAACAAAAAAGCAATATTTTAATTTTAA  
AGAAAAAATGTTGATTATATTTTTAGTAAAATCCAAAAGTGGTTTCTTAGTAGGTGTTTT  
GACTGCCCTCATCCAAAACCTATCTCTTCCACTATCCCCAACTTATGCTCCCTCTCT  
CTCTCACACACTATATATGCGTGCGGATTTCTCTGCTCCTTTAAACAACTCCATCAA  
CAGACTTGCCCGAACTCTTAGCTCAAAAACCAACTAGAAAAAGAAAAAGAAAAAA  
AATTAGAAAATT

SmIPPI

ATATCTTAAAAATAATACACAATATTTTTAGAAATTCGCATAATATATTAGTTTGTAATAAAT  
AAAATTTATAAACTCATGCTGATTGATTCAAATCTAAATTTCTTGACATGTGACATTAA  
CAGCGCAATATCGTTTTCTACAAAAAATAAAAACTAAATGTGAAAGTGCGACTA  
AAAAAATAATAAAAAATAAAAACTCTAATGTGAAAGTACCTAAAGATAAATTT  
CACATTCATTAGTATTAACCTATTTTGTCCATTCATTGATGTGGGCCAGATCAGAATAA  
TACTAATATATTGTTTTTTGCGGTTTATTTGTAGTTTTTTTTTTGAAGGACGGTTTATT  
GTAATTTATTTGACTATGTTTTGCAGCCAGCCATCTTTGAAAAGACTTTCTACTTGTAC  
CAATTAATGTCGCCATTGTCAGATTTCTCTCCTTTTCGTTTTGGCGTAGCTTTAAAAGTC  
AATAATGGACTCTATTAATTTGAAAAAATAAATAAAAAATACTACTCCGTCCCACGA  
ATTCTGACACGTTTTCTTTTTGAATCGTTCCACGAATCTTGACACGTTTCTATTTTTGG  
TTGTAATAATTATTACCTTCTCTATCCTACTTTTATCNGTCAATAATGGACTCTATTAAT  
GAAAAAATAGTAAATAATAATACTCCTTCCGTCCCACGAATTTGACACGTTTCTCT  
TTTTTAGCTGTCTCACGAATCTTGACACGTTTCCATTTTTGGTAATAATTATTACCTTGT  
TCTCCTACTTTATCACTTTTATTACCTTCTCTCTTCTACTTTATCACTTTTATATTTTAA  
CTACACACTTAAAACACTAATCTACAATTCCTAATTCTCGTGCCGAATCCAAACGTGT  
CAAGATTCGTGGGACGGAGAGAGATGTTTTTCTTTTTGAAACCATAAATAAAAACCA  
ACTATCTTAATGTTCCACATTCTTGATCCAAATCTTTCAATACGTTTCACACGACCTCG  
TCTTATTTGTACATACTATTTATATATGTGATTTCCATATGACATAAAAAACACATGCTA  
AAAAAAAGGAAATTTTATATTTATATCTTTAATTTTTTTCTTAATTTTAAAATATTATTC  
TTCAATTATCAAGTTTTTTTTTATTATTTTTATAGCTTTTATATAAGTAGAATTGATAATTAT  
ACTCTCAAATTTTACTACATGACACTTAAAAAATTAATAAAATAAATTTTACATATGACA  
CTTATTTTAAAGAGGCAAAAAGCATACTTTCTACTTGACGTGAAATTCATACTAGTATAAT  
ATTTGGATACGAACTTACCTACTCCATTAATAAAATGTACCTAATTAGTGCATTTTCATC  
AAGTAGTAGATGGTGGGGTGGGGGGGGTGGGGTGGGGTGGGGTGGGGTGGGGTTATATATAC  
ATATTAATTAACCTATGAATGTCAAGTTTGGTGCACTAATTAGTGTTTACCCTGTTATTCTG  
CATCACATGTATCTTGTGATTATAAATACTAAGTTTTTTTTGCCGTCTCAAATGAAAATTA  
ATAGTCTCCATTTATTGTTATGAATAGTCATCCATCTCAGTAATACTTTACCCTTTTATGTT  
TGTGTGACAAAATATGGAATATATATAGCAATTGAAAATGAAAGGTTGGCAAAATTAGG  
AGTAATTGATATTCACCAACTAAGTAAAGACTGCATTTTTATACCAACTTTTGTGCTAT  
TGTCACATATTTATTTAAATGAAATCCCACGATCTGCCCTCGTGATGCGTGATTTGGTG  
TGTTTAAAGACAACAAAATTAATAATAATATTAATCATTTTTATCATGTGATGGTATAGA  
TTAGTGAGGTTACAAAAGAAATTAATCAAATAAAATCAGTCATGGATCTTAGCCTAGTT  
GTAAAGGATGTGATCCACTCTACTCTATAGTTGTAAAGTATATTACTACTATACTTTTGT  
TTGAGATAATGTGAATAAATTTATAACAACCAATTCAATTTAGGTGATTGAGTTGTAGA  
TGAAGTCGATTAATAATTTGCACCGACCACTTAAATATTGGTCCAATAAAAAANATCATT  
TACTACATAAATTAAGTTCGGATTAACCTACTCATCCGTCTCATTACAAATATCTCATTACT  
TTTAGACACATATATTAATAATATGTAATTAGTAGATAAAGTGAGTTTGTGAAAATTAAT  
TAAATATTAGATATAGAAAACAAATATGTTACCAAAAAAATGAGACATTTATAGTGAG  
ACATTTGTAATGGGACGAAAGGAGTAATACTTTACTCGTTAGCATGGAAATCTAAATAT  
TAAAAATTTAGTATCTAAAAATAAATTGTTTTGGAAAACAATGAATACTTTATCCGTCCC  
ACGAATCTTGACAGTTTGGTTTTCGGCACGGAATTAAGGAATTGTAGATTAGTGTTTTAA  
GTGCGTATGTAATAAAGTATAAAAGTGATTAAGTAGGAGAGAAAATGTAATAGAGTGAT  
AAAATAGGAGAGAGAATGTAATTAAGACCCCTATTTTTGGATTAATTATTACCTTATTT

GAAAATGTGTCAAGATACGTGAAATGACCCAAAAAAGAATATGTGTCAAAGTTCGCGG  
GATGGAGGGAGTATAAGATTGAGATATTAAGTTCATTTACCCTCAATTCAATAATAAT  
AAAAATAATGATGATATTTAGCATTTTATTATTCTTAAATACATTGGTGAGTATTAATTG  
AATTAGCACAATTAGATAAGTAAAATTTAAATCTAACAATACTTAACTTTGATTATACC  
CTACTAGCATAGGCCATCAAAGATGACTTTTTTTAAAAGGAAAACAAAATATTGAAATG  
TTCTGATAAATAGTTTTATTTTTAATACTTTTTTTATTATATAAAAAATGAAGAAATTTGC  
GCTGGCGAAGAATCAGATAACAAAGCGGGCAGTTCGACTCCACCCCGCCGCCGCCA  
CAACTGTAATGGTGCTTTGCTAATGTAAAAACAATCCCTTTTTTTCCCTACCTAAAAAGA  
GCCCAGTATTAATAATGCCATAAATTTCCATTAATAAGAAAAGAAAA

SmHMGS1

AAGTAGGGATGTACGCTTCTTCGACCGGGTTCGTTGTTGTGCTCAACGTACACCATGGG  
ATATTCGGCAGTTTCCAACAAGCCTTGCACATCATCGTCGTCACTTATTACGCATTTTCG  
CTCCCTTCAAATCGATTGGTCGCCAAATAATAACAATTGATAGTTCGGGCTCAACGAAT  
GCATTGTCAGCACATTGTTGATGCTGTATATCAGGCTCGCAACTGTTTCATTTAAGAGG  
GGAAGGACCTCCGTAGCCCCGCCAACATAGTGTATAACCATCGACGACTCCGTTGTATCT  
CACATATATGTATCTCACGAATTCATCTATAAAACCACATAAAATACAGTATTAATAAC  
GTTTAAAAAGTTCAAAACATCACAATAAGCTCGAAAAATGAAGTATCCGCCAGTAAAT  
CATTATCCGACACCAGTAGCCGCTGACCTTGTAGGGTTCGGCGGCTATTATCGTTTTTCTA  
ATGATATTCTGGCGGATACTTTATTTTTTTGGGTTCTAAAACATTCAATTATATTGAAACA  
AGTTTAATATTTCCCTAACATGCTTTTAAATTTTCAGATAATAAAGACATTCATTAATAA  
CGTAAAACATGCTCTCAACGTTAAAAACAACGTACGATTAACATGCAAACCTATAATTA  
TACAAACAATACAGGAGAATCACCTTTTCGGCTGAAATTCAACACAAATTGCCTCCTCT  
CGCACAAAACCACTCAAATCTTTAGGGTATGCCTGAATTTATGAAATTTCAAGGTGAGT  
ATTTCAATTTGTGTTTTTGGTCAATCACAATGCAGCCTTATAAGGACTAAACTTGATTC  
CTTACAAAAAGTTCACGTGAAGTGCAGTGTTCATTCAATACGGCTTCAATCTATTATTG  
CATGTCACCTCACGCATGCATAAAATTAGCATTAAATGCCCCACTACAACCAAATTTTTTT  
GCAGAGTCACCTTCTCAGTATGACTTTTAAATTTTTTACTAAAAAATTAAGTAAAAA  
ATCGCAACAAATAACAAAAGGGGAATAGCGTATGTTATATTTAAACATTCATAACAAGA  
CTAGAAAAATTAATAATAACATAATTTGACATAAAATATTATTTTCTGCCTAACAGA  
CCAAGTATCCGCCAGAAAATCGTACAAAAAGTTCAGTAGCCGCCATATATTTTTTTGTTA  
GCGGCTACTGATAAATCAAATAATTTAATGGCGGATACTTTACTTTTTTGGCTATATAATAT  
TATTTCAATACCGAATATATGAATTTCAAATAATTGGTATATAATTTCTTATTATTTTTATG  
TGCAAGTCTATTATTTTTTTGTGTAGTCAAATCATGCATAAAGTGAGTGTTATTACCCCC  
CACTATAATCCAAATTTTTTGGCAGATTCACTATCTCTCATATTTTCCATCCATGTGTA  
CTTGTACTGTACATATTTCACTATCTCTCATATTTCCCCTTGTAATAATAATAAAATCT  
AAAAATAACGGTGCATATGTAACCTAAAAAAATCACGAAGGATAAAAATTCACAATCA  
TGCTAATTATGAACAAAGATTTTTTTTTGAAGCGAATAACACAAGTATCCGCCAGTAAAT  
TAGTAGCCGTTGAATAGTAGCCGCCGGTCCAAACCTTCAGCGGCTACTTCGGCCGGCT  
ACGAATTACTGGCGGATACATAGTTAATGGTTTACAAAAAATAAATCTTAAGAATT  
GACATATTCGTGATTTTTTTGGCCTTCGTATTAATGTTTGTAACACACAAACGTCCCCTA  
ATTTATTCAAATTTGCAAATCTATTTAATCTTATAATGCATGAAAGTGACGTTTTTCTCAC  
ATTTTGTACCAATTTTAACTGTTTTCTTACACAACCTTTACACAATTTCCATCATCATCA  
ACTTTTACACAAAAACCAAGCAACCCATCACCATCAAACCTTGCTTTTCGGTCTTTGA  
CTTTGAAAGTGGGTAGTTTTGCAAGACATATTATTGAAGTGGGTAGATTCCCCTATTAA  
CACTTTTATATATCCTATCAAATATAATACTATTAACATATATTATCCAGCATATTAATGCAC  
CTCAAATAAAATACCGGAGCACAAATTTTTAAGGGAGGACGAAGTACTTTTTTTAGA  
AAAAAAGAAAAGGAAAAATGAATCCAAGAAAATGTGGGCAGTGAAATAATAATAGT  
AATATAATAATAATATATGGTTGGTGAGTGGAATTCACGAAGTCTGCATTTGGGGGCTG  
TGGAAGCAAAGAAAATCGGAAAAATACTGAATTTATGCTCATTTTCATCATCTCTCTCT  
TCCCTATATATACTACACACCACCACCTTCCAATTTCTCACACCATTCAGCCACCCATT

CTCTCTCTACCTCTCTGATTCTGAGCTCTGCGACTACTGTGTGTGCTGTTAACTGAT  
CCGCTATTTCGTTCATTTCTGCAACTCAAGAAGTCGAG

SmMDC

AGTAGATGATATATAACAATGACTTGCATCTTTCAAATGTTTCGTTACATTATAAATCCCCA  
GTGACAGAGTATTTTTCTGAGGTTTTCACTTCTTAAATTACCTCAGAATCATGCTTT  
CAGCGTGCTACCCACAATACTTGAAGTATGCTTTTCTATTTAAATTCAATTGTTATAATAC  
TGAAGTAACTAACTATCCCATAGCAAACATTCGCCAATAGCTGTTTTCGTTCTTGTTATG  
TTTGTTAACTTTTCATTACATCTTTGAGTTGAACAAAATTAATAATTGTTAACAGGGTGG  
TTCAATTAGATCTGAAAGCTGGCGAGGAGATGTTGATAAGCTACTTGTAACTGTGGCC  
ACATATGCTTGCAGCGGGGTTCCAAGGAGGAAAGGAAGATTCTTCTATCAGGTGATG  
CTACGCCTACGTGGTCAGACTTCCAAGTAGCTGCCTTACGTGCACTTTTGGCATCTCTT  
CTGTCGCCTGGCAGAGTACGCCATCGCACCTGGCTATCGGTCTAGAGCTTTTCCGTAG  
AGGTGATATATCATACTCTATCGTTCTTCTTTCTTGAAACTCACCAATATACAGTTGCTT  
ACTGCTTCTCTCCATTGCTTATGCTTATGTATTCTGCAGGCACGCAAGCAACAGGCACA  
CAGCTTGCTGAGTATTGTGGGCATGCACTGCTGGCCTTAGAAGTGCTCATAACCCGA  
GGAGCCTTCCCTTGTTCGGATTTCCATTCTAGTGGTGATGACTATAAAGCTCTGGGCCAC  
TTGCGCGATCCTGTGTACCCTAGTGGAGACGGACGAATCCCAACTATCAACCTGATAA  
GCCTGAATCAGAAGAAGATGATCTAATCGAAAATTGGCTTGGAAAAGATGATGAAATG  
GAGATTCAAGTCACCAAGAGGCAACATGACACGCCCAGGGACCCTGCTGATGAGATC  
ACTTCTGGTATGAACGCCCCAAGAAAAGCGAGGTTACATCCTCAGGAAATGTCCCTG  
ACAACAAAGGCATGGCGTCTACTGATGATGTGGTTGAAGCTCTACGCCTGAAAAATAC  
CAGTGACCAAAGTGGAGGTGTGTTAGAAAGTGTGCGAGCTAGAGCCTACGACTAGGAG  
AGCTGCAGCATCAGTAGAGAACGACACAACAGCCAAGAGTGGCACAACCTTCTGTTTC  
AGAAACCACGGGTAATGAGTTTTCTACTATATTTGAAAGAATATCTGCTACACTATCGA  
ATATCGACAGAAGTAAAGAGACGATGTTTGAAGCAGACGATGAGGCTGCAGATATATT  
TCCAGATATCGTGGATGGCGATCCAGATTCCGACTAGATTGAAGCTTGAATATAAGAG  
GGGTGTTCTGGTATATGTTCAACACCAAGTTTTGATGATGAAAGTAAATTATTGAGTTCT  
GTAGTTTTCTGTACTATTTTACGTCATTACTACTAAAATAATTGTTTCAAAGAACATTA  
GCTTGTTACTATATGTGGTTTTCTTACAACGTATGTTTGAGTCATTTAAGCAGGCTGAAC  
CATCAAATATTTTTATTTGTTATTACGAAAATTATTTAATATTTTGTCCGGTTGTATCATA  
TATGACTCAATAGGTCAAGCAATTGGTGCTGACTTATTTGGTTGTTTTGGTTTTCTTATT  
CTTTAATTAGGATCCCAAATTTCTGAAAGCAACAGCTTACAAACAGGAGTAGAAGATT  
ATCCCTCATTCTTACTACTACACATTTACAAATCTAATTCTGTTTGGTACCCTCAAACAA  
ATAAGCTACTTCCATTTAGGATACAATTGTAATTGCAATAAATATATTTAGGCACAGTATC  
ACATTGTTGATATTCAAAGCTTGGCTGTATACTTTGGACTCTTTTTGAATGATTCACACT  
TTAGTGGAGTGCAATTTTAAAGTATTGTGATATTTATTGCCGATTTTCCAGCAGCCTTCA  
CATCTTACCTACCACCCACCCTCAATAGTCAATTCAACTTGATTTTATGATATTTATTT  
CAAATGCTAAATTACTATGTTATAAATCTAAATAAATATGCGGAAAACCTATTTATGCGC  
AGTTATGTTAGGTGCACGGATAACAAATTTTTATATTTAAATTATATAAATTGATATTCATA  
ACCATGTCATTATAACAATAGAATAACGACGTTGCATCACACAAGAAAGTAAAGAATCGT  
GTATGTTAGTTAATGGTAGACAAAAGTTATGAATTTAAGTCATTGTAATGCTCATTTTT  
ATAATTAAAAAAATGCTCATTTTTTAAATTTCTATTTATTCAATAATGAAAAGAAAGGG  
AATCTTTTCTACTGTAATCGGTTGACACTCTTTAATAAGTCAAAAATTGTGGGTTATGC  
AAAATCCCTATTTTTGTATTATTTGCTGTAAATTAATTAATGTATTATAATTAACAT  
AATTTTTTTTTTTATGTTTCGAACGTCCACACAGGAGACTCTCTTAATTAATAGTACTCA  
AACATATTTGTAAGGGAGATGACATAACTTAAAAAAAATAAGTTGTGCATTTGATGA  
GCGGAGAAAATGTCCTAGTAAATTAACAAAACATGATGATAATTAATAAAATTAATTTAA  
AAAATGATGGTTCAACTAGTGACATGTGCGTAAATATGTGAGAATTGTAAGGATGATAG  
TTATTGTGATTGTTTTACAAAATAGATTAACAAAATATTTTGTGGACGAATACAAAATA  
AAAAATAGGAAGATGTGCAATAATTTTTTTTTGTTGAGTTAGATAGTTTAGTAGTAAGAC



TACCATTAAAGTTTCAATGATTTAATCATCAATTATTATTATCAAAAAAAAAAAAAACACA  
CACACACATCAATTATCTATTCTAACTTAAAACAAAAACGATTAATATCATGGCTTGC  
AGCTGCACGAATAGTTTGAAGCTTATGACTTCAAATTTGACTAATTCTATTAAGAAAA  
ATTAAACCTTAAACCCTAATAAATCGTAATCAAGTTTGAAGTAAAACATGAATGAGAAA  
GCGGCCCCACAGCGGCTGCCTAGTTTGTAAACGAAGCCTAAGTGTTTTAAAGTTTCATT  
CAACAATGGCGTTCCTCTATTCTGACCAATCTACCCCTTCACACACACACTGCGCATGA  
ACATATACGTGCAACCAACTGAATCTACACACTCACACCGCGCATTTCGATAAATACTG  
CGCTCAAGCTGTCAGATCCGATCCAATCAAACACAGCAATCTTCTGAAAAATTAAGA  
GAATTTTC

SmMK

TTGGAGTATATCTAACATGTTTCTTTAGTTAAGATTTTGGATTGGTGAATAAAAAATAAT  
TATGAGCGTGTCAATTTAGGATTAATTGCTTTTAAATTCATAAACTTCGATCAATTTTAT  
TTTTTCCATAAATTTTTATTAAAAATCATCAACTATCAATTTTACCAATTTCCCATC  
AAGCACATTTCCGGAAAAAATCAAACACGCGTGGAGTCGGATTTGCCAACGTGGAC  
ACGTCGAAAATTACTAAAACGGCGTACGTAGTCTTATATTCCATTTGTACACGAAAA  
TCATTAATAGTATATGTATAAGATATAAATTATTATATAAATTACATGCCTTATATTCCTTA  
ATATATATATATATATATATAGTAGGTGTGGTCTAGAGAGAACTACTATTGTTTGTGAG  
AACGGGAGAACCATCAAATCTAATGCATTCATAAAAAATTAATGCATTCGCTGTAA  
AATTAATGCACTAAAAAATTTAAAAAATGCTCCCTTCAGGATTCGAACCCAGGATCT  
GCATTCATCCAACAAGATGATGCATCCACCGTAGATCTTGATGATCGAATGGCTGAAAA  
TGTTCTCCGGTCTTCTTTTATTTATGGTCTTCTTGAACCTCTCCCTATATATATATA  
TATATATATAATTTAGTATTCTANTATAGTAGTATATATATATATATATATATATA  
TATATATATAGGGTTAGGTTCAATGAAAAGGCCTAAATGTAAGAAAGAAGAGAGAA  
GTAATCTCATCCGTTGATCTTATCTAATCTAACGGACATGATTTGTTGGGGGTTCTGGG  
TTTCGACCCCATATGTTCAACGAAAAATCCATTGAACATGGTGTGAATAAATTATGT  
CCGTTAGATTAGATAAGATCAACGGATGAGATCACTTCTCTCTTCTTCTTACATTTAGG  
CCTTCTTCAATGAACCTTGTTATATATATATAGGGGTGGGCTACCGTGAGAGCACATC  
TTAAATAAGAAATAAGAGCAATTTTAAATGTATGAATTTTATGTAGAACACGTATGAAT  
TCGCTGTATAAAGGTATGAATTATGAAAATAATTTTTTGCTACCTTTGGGATTCGAAC  
CAGGACCATAAATCCATCCAACAGGATTACGAATCAACCGTAGATCTTGATGATCTAAG  
GGCTAAAATGATTCTTATTTTATATCTTAAAGAAATGCTCTTATTTTAGTCATTCTCTATAT  
ATATATGTCGGAATAATTTTTTTGAGAGGTTAGTACACAATTAATTTATATATTATTAT  
TATATCAATTATATTATCTTTTTTTTATTTATAATGATTAATCTTGATGAAATATAGTAATG  
ATGTGTTATGTAATATGACTAAATTAATTATACAATTAATTGTAACAGAAAGGATCATCT  
ACCCACCATAGAGACAAGCATAACGTGCCCATCATTAAATGTGACAATTGTAATTAGAGT  
AAGGTAATTTTTATTTAGAGTAAGATTTGTTCAATCTTTTCATAGGGAGATTGTAIGTAT  
ATGAAATGTTATCGTTTATTGAAATAATTACATGTAATTACAAACTTTTATCAAATTTG  
TTTTACGCACTACAAGAAAATTTGGTTTATAAATTACTACACTATTAATTAATTATGATTT  
GATGACCAATGTGAATTTACTCTCACATTATAATTGAGTTCACCTGCGTAGCATAATCAT  
ATGTACAAAATTTACGTTACAAAATTATAACATATTAACGTTACAAAATCTCAAATTTA  
ATAAATAAATAAACCATGACATAAAATTTATATATTCATTAATTTTGAAAATTGTGA  
ACCATGAAACCCTAATTTAGTTTTTTTTTTGATAAGGAAAGTAAATATTATAGAACGAA  
AAGGCACCAGTAGTACCAAGAAGATTACAAAATCATCGGTGATTCATCATTGACATCC  
ACCTATGAATCCCAACTTCATCGTTAACAAAACCAAAAATTTACCCCAACTCCCACT  
CTAGCTTTGATTTCTCGAAACAAGTTTGCCTCTCCCATCTTTTGTCTCAAATCTACTC  
TCATTACGCATTTTCCAATAAGCCAAGTAGTACAACACCAAAGAGCCATCAAGAGCT  
TCTTATTTCTTTCCGGCCACTCAAAGTAGTAAAAAACTGAAAGTGTGAGGACACGTC  
ATATGGCTGCGCCATGCTAACTCCGAGCCATTGAAAGATTGCTTCCCATACCTTTGAGG  
TCTTTGAAAATTGGATCAACAATGAAACCCTAATTTAGTGGTAAAATACAAAATTAGAA  
TAAATTAATAAATAACTTATTCTATCCCTAAAACATCTTCTTATTTCTTTTTTGCACGT

CCTCGAAACATCTTCATAATTTATTTTTTTGAAATAATTCTACTATTACCCTTACAATTTTA  
ACATATTTACACACATAGGCACTAATAGATACACCTTTTTTTTCATTTTAATTGGCTCATT  
GTCACTATCATCATTTTTTCTGTATCATTTTTTCTAATTTGTGGGACCTCTTCTCTATTCA  
ACAAAATATACAACTAACTTTTATTAAAACGTGTGTCGCCTTCCTTTAGAAAGATGTTA  
CAGAGATGAATGGAATATTAATTTTTTTTTTGGTAGTGTGCAATGCTAAAATTTGATCAA  
TGTTTTGTAATATATTATGGCTATCTATATCGTGCATTGCACGGGTACAATATCAGTTCAA  
ATATAAAGAAATGTGGCAGTAAAATGCATTTATGGAAAATGCTCTATCAAACACCAA  
TAATTTTTTAAATATACTCCGTCGTCTGTACTAATTTAACAGGCCATAACAGTCGTGCAC  
CGATGTTAAGAAATAAATAATTTATAATAATTTAAAATAGGAGAATTTTTTTTTAAAAATTT  
GAGTATATTTGTCTAAAAATAATAGAGATAAATAGATATATTCTCTTCTAAATAAAAAATA  
AAAATAATTATATATTGCTCATAATGACATATGGTGTAATAATAAATTATATATAAAAAATT  
TATTATGTATTGATTTTTTCATTTTAAAAAATGGTGCATACAAATATTTATTAATAATGAGAC  
AAAAGAAATGTGACCTATTAATTTGAGGAATTTTCGATTAGATATAAACATTATTTGAT  
GGATCTCGACTCCTCGAATAATCTAAACACAAACTCTATGATTTTTTAAAACTCCTGCTC  
CTAATGAATTCAAAATATTTAAAAATCTAATTTGCAGCACAAATTGATTTTTTATCCTACA  
ACATGCTACATTATTTTTTATTTATTTATTTATTTTAAATAAAAAAAAACAAAACAC  
AATAGAGCGTGTGACCACGCGCAGTAAACCCCCACCAACGAAAATGGGGTCTCATT  
AAAGTTGACACCCTACGCTTTTGGAAATCTCCGCCATTGGCAGCCCGCCATTACACACA  
CTCACACACACACAGAAACTCATTACACATTGCTGCTCAATAAAGCCCTAGCTGAG  
CTGATTTGATCCTGAAAGAGACGGAATAGT

SmPMK

TAGCGAGCCAGCAAGTTAATTCTCCGATTAAGGAGGTTGATGGTGATAAGCAGTCCAA  
TCCTACTCTGGAGGATATTGCTAGTCGTTTAACTCGGTTAGAGGAGCAGGTTAATCAGG  
GAATGCAGTTGCTCTCGGAGCAGAAGCGCGGATGTGGTTCGTCCAAAGGGCTCGGGAA  
AGGGAAGAGAGCTGTCATGCAGTTCTGGAAGGTTTATTAAGATCGCCTTAGGAATGC  
GGAAGAAATGAGTTACAAGCCGATGGAGTTTGTGGTTGACCTTACCAATAGGCCCAAT  
ATGATTGCAATGAATAATGTTGCCATGGGCGTTGGTTCGGATGAAATGGATGATTATCCT  
AAGTTTCGGTATTAAGTTGTTTTTTGTTCCCTTAGATTTTCCATCTCTTTTCGAGATTTGTG  
CCCTTAGTCTGCATCTTTGTGTTTTCAATGGATGATTTTTTCTTCTTTTTCTTTTATAATAA  
ATCTCAATTTGATAATAATGTTATAATTGAGGTTAAATTGAAATTTTGCATTTTTTTCGT  
CGGACTATAATGTCATGTTATAATTGAGATTAATTGAAAATTAGTGTATTTTTTCGGTCA  
AATTATAAGATCGTGTATAAACCAAAAAATTGACAACTACATGATTTTTTCGACAATA  
ATCTTTTTTTTTTATTGTGAATTTTTTTTTACTTTTCAATATCCGTTCAAATATACTTAAT  
TAATTTTTTTTATTTAAGTATAATAATTGAGTTGATGTCAATTTTATATAAATATAAAAAAT  
CAAAATATTTCCGTGCTTTAAACGAGATGCAAATGATAGTTGATAATTAATAGTGAAAT  
CATAATTTGTGAAATTGATGAAATTGAGATTCATTTATGAAAGACAATTTAATCATTAAT  
ACTTTTTATTTGTAAGTTATTTAATGCAAATTCCTTTTCATGCTATTAATCATTTAATTAAT  
ATTTATACTTGTTTTCATACATAATAATTATTATTATGTAACCTTTTTTTTTGTATTATTATAAT  
TACATTTAAGTCAAGTAAGTAATACTTTTTATGTTAATTATCACGTTTAAAGCCTGATTAAAT  
CATAATTAAGTCATCAATTAATAATACACGATTTGTATGACCATATAGCATAATCAAATT  
GTTATGCAATTCGGTTTTTGGCCAGATGACATCCGAGACATTCTTGTTTTAGCTCGTTCTC  
CATGCTTATTAGTGTTAATCATATGTATAGGGAGCGATATGTAGCTCATAATCTCGCGCAA  
TTTGCACGCTCTTGTAGCAACCTGTCTGTTGGATTGCTGAATTTCCCCGATGGCTCCG  
TGATTTGCTATCGGTGGACTATCCTTAATATATGAGTTCGTCTTGAGTTTCAAAAAAAA  
AAAATGTTATGCAATTCATCTACTACATATAATCAACTGAATTCATGATGAAATTGAGGT  
TTATTATAAAGAAAAAGAAAAATAAAAACCCATGAAAGCACAGAACGCAGTCTAA  
GGGTATGAACTCGAAAAGAGATTGTTAAACAAAAAGAGACCTAATCAAAGGCTCTA  
GCAAACACAGGACATCTATGCATCTACCAAAGAGGATCGTCATCCATTTTCATCCGACCA  
ACGTCTATGGACTACAGTATTCATTGCACGCATGCTAGCACTATTGCTAATATCAACCAC  
AAAGTCCCTCGGACTGTAACCCATTTCTCTGCATTTCTGAGTCGACCTTTAATGCTGC

CTTCCGGAAGCTGCTTGAACAGGCTCCCTTCCCATAACCTTTCCCGTGCCCTTTGGGCGG  
CCACGACCTCGCTTTACCGGCGCTTCCGAGAGCAATTGCATCCCTTGATTAACCTGCTC  
CTCTAAACGACTAATACGCTTATCAATATCCTATGGGGCAGGAGTTGACGAAATCTTGC  
CACTATCAAGAAGGACACTCCACTTATATCCACATTCTGCAGAGAAACCCTGTCCGTT  
TGGGCAAACCCAGATCCTACAGCTGAAATTCGACCACCCGAATCATGTGCTCGGCTG  
CTTACTACCTGTTACTGGGGGATCAGCTGCTGTAACAGCAAGCCCCATATTTTCTGAG  
ATGTCGCCCTTCCCGGACCACTTCCATTTGCACAGCAGGCTCAATATCTGCTATGATT  
TCCTCGTCTAATCAACTGAATTTGCACAGCAGGCTCAATATCTGCTATGATTTCTCTCGT  
CTAATCAACTGAATTCATAACCCAACTTATATATATATTATACATGTATAAATTTTTTTAAA  
GTCCAAGCCCATCTTCTTACACATCTCTTCTCTGCAAACTCAGCAAAAGAAGACAC  
ACGCACACAACCTTCTTCCACCCCTATCTCAGAAATCCGGCTGGTCGTCTTCGTCTCT  
CTCTCAAATCGAGCAAAATCGAAAATTTCCAATTTTATATTTCAAGTGACACACTAGCCC  
TATTTTGCTCTTAGACATGCTCAGACCAAATCCCGAGTGGCATTCAAGTAAGTGGGAGT  
CGAAATAAAGGCCGCCACGCCCTTCTCAGCCTCAACTCAACAACATCAAGAACCCA  
TAATTAATTCTATTTGTTAATCAGGTGAACTAACTTCTTCTTCTTCTTCCATCACCAGCA  
AGTTTCCCGGATATAAAAGGCATTTTCATATCTTTGTCTATTTACACCACGTTTTCTAA  
CTTATGCTATCAAACGCAAATATGGACACTCACGGCCCACCACAGGTATATTTTTTAAA  
ATGGGCTTCTTAAATATGACCTTCTTTTCAAATACATAACACAAAACAGGAATTGAAGG  
AATCGGCTGTATTCGGAAGGACGGACCGGTTTGGTTCGCGGAAATCCGGCCGCCGCAC  
AAGTTTGAAAGTCATATTCGGAAGTCAAATTTACACACTCATAAAGACTGCTGCTCTT  
ACTTAGTTGTTATCGTCGCCTTCATTCATCCACCAAATCCACGCACCTGGTACTCTCT  
TCTTCTCTAGATGCATATATTTTTGTTTAAACCAATTTGGCAAAGTTATATTCTTCATTTT  
GGTATGATCTACCTGTCAATGATCGGTATGAAAACCAATTTCTGGTTGAGTTGAGCTTA  
AATAACAATCTACAGTATCTTCTATTTTCATATATTTTTTTGTTAATCTAATGATGGTG  
GCTAATTCTTGAATTTATCGGGTTTATGATTCTTGAATGCTCAGAAAGTGAATATGTGT  
GGGAGTAAGTGGGCTTGAACCAATTTTCCGTTGTTTCTTCAATTAATTGTCCGAGC  
TAATGTTGATTTAATTTGACTTAGTGTTAACTAATTTAGAACATGACTGGAGGAGGA  
AATTGTCGGTTGTATCCGAATTGGATTGGAGAAAGACAAATTTATAGCTTTCGGTATTTA  
TTAATTGTTCCCTCAGTGGTGAAGAAAGTACCTTTTTATACCCAATCGTGTTTGTGTT  
A

SmRAS

TTTTTATTTAAATACGAGGATAATAGTAATAATAACGAACAACATTTTCATAGATTATATA  
ATTTAATATATTACAATTTTTTTTGAACATTCGGTATATTTAGACATTTTTTATTAAGA  
AAAACATAATAGTAATAATAACAAACAACATATTGTTTCATAGATTATATTGTTTCAATACA  
TTACAAGTTAGAATCAATAGTAATAAAAGACAAGTATAATAGTATAATAACAATTTTTTT  
TTGAACATTTACATATTTTAGGCATTTTCTATTTAAAGACAAACATAATAGTAATAATA  
ACAAATAATTTTTCATAGATTATATAGTTTTAAATAACACAATTATCTTTAAATTAAGTAT  
ATATATGTGAGGGAATATAACCACCAAATACTCTTTGTAAAACAAATAATAGGCATAAA  
CATATATCTATATATATTTAAAAAAAATCTCAAAATTTTGGAGGGGACTCCTCCCCCTC  
CCCCTGATAACTTATCCTATATAGCATTATCTTAAATTAATATTGGATCATATCTATTTA  
ATTAAATATGATATTACAAAATTAATCTTATTTAATTCTACGGACCGAACCCCCTAATAA  
TATTAATCAATTGTAGATTTGTTGATTATATTTTTTCCAATTAATTATGTAAGTACTAGCTTAGA  
GAAGCACACGTCAAATCATTGTCAACTAAAATTGTTCTACACGAGTCTCTGAAATTT  
GAATTAGTACATACGGAGTATCATATTTTATACTCCTCTGCCTTCAAAGTTATAGTGTA  
ACATAGATGACACAAATTTTAAAAAAGTGTGGTAATTGTGTTTATTTTAAATAGAGATTG  
TGTTTACATCTTTTTTATAAATAGTAAATGAGTAGTTTGTGGGTTATTAATAAAGAAA  
AATCACAATTTTCATAGATGTACCAATATATTAATTAATAATAAATTAATAAACCACAA  
ACTACAAAATAATGCCGATTATGCGGATAATTAAGTGGATCACAATTTTGTAGTAC  
GAAGGTGTATACGGATGAATTATATCTATATAAGTATTTTATTTTAGAATACACGGTAACA  
TAATGCCATTTTTTATTTTATTCTTGTGTCGATGTAATAATTTAATGTTATTTAATTTT

GGATGCAATAATTA AAAAATTA AAAAATAATCATCCGATCCACTTTTTTCATAGACGATTTTT  
ACAATTTTGAAAATTTATTCGGAACGAGCGAGTATTAGCCGATTACGCCAAATCATGT  
GTTAGATATCCCCCGTAAAAGGTAGAAATAATTA AAAAATAAGACTGGCAGGTCCGGG  
GAAGACTTTGACACGTGCGGGAGTTAGGTGGATGTAGTAGTCTAGTAGATGTGTAACA  
TGAATACTACTCACTTTTTTGTGACAATTTATTTTTTGCATATTTGTTGACAATTTATT  
TTTTGAGGCAAAAAAAGGACTATATTA AACATTGGAATGTACAATATCTAAAAATTA  
GATTCAAATTTAGAATGAGATTAATTCAACAACAATGAGCAAGCGCGACGCGCT  
CTATTCGCCTCACGGCAAGTGTGCGAAAATTCAACAATTAAGAGCGTCCGGCAAAAG  
TAAAAGTCACCGATAGATCATTTCGGCAACGAAATCAAACTTTTAACTCATCATGAAAC  
ATGTGCACAACAAGAAAAAATTAGTATACACACCAGAGATCTTAAATCGGTATTGATG  
CATAACCAATATCCAATATAATCGCATGAAGTATGTGCTAAATACGAGATCCATTAATTA  
GTATTATGTGTCACCGGGTTATTTATTTGTTAGATTCTATTTTAAATTTGATGTTTATACT  
GGTGTAGTTAATGAGGAGTTTGATTGAAAATTAAGGTATTAGGAATTTTAAATCGGTA  
AAGAGGAGAAAACGTTTAAACATGGTTTAAACCATCAGGTCCATATTCGCAAATATAATA  
TGAATGTGATAGTTTATAGTTGTATTTTCAGATAAGTAATGTGCATTTTTACTTTCGTAA  
TTAATGATGTAGTTAGAATAGTTTCAAAAAACATTCACAAGTGTATAATTTTATAATTTTT  
GTCCTAATTTCACTATAAAAAATGGCATTTTGAAGCTTTTGGCAACGACAAAAACAAAT  
TAAATTAATCAAGCTTGATAACACA ACTCTATCAATTTTATATTCACAAATTCGGCAA  
TTTTTTCGGTGTCCGTGAAACTGAATCTATAGACTTTAATTGAAATATATGCATTTTAAAT  
AAATTAATGAATACTTCCAAAACATCATAAATAAATGCAATGAATTACGGAACCAAAC  
ATGTGTAATCGTGCACGAATTGATCACAACACCTACCATTCTCGGATAATTATCCAGG  
ACTATTTCAAAAATGGAAAAATCAACATCTGAGTGGTATAACAAAGTAACAACCAAGG  
TTATAGTAGATCAATCTTATTAACGTGGTTTCATATAATGTCTTCCTCTATTTTGACAATTA  
TACTTTCAGATCAATATATGCGTCTGAAATATAATTGAAACATGCAGAATTCCTACATAG  
ATTTTATAAACCATCAATTTATACTCTGCCCCGTCCATTTAATTTACTTGGATTGTTTATT  
TTATAATCTATTATTTTTTTGAGTTAACTTATTTGACTTGGATTGTTTATTTTTTAAATAAT  
CTCTTTACACTATTAATATAGACTCACATATTTTTTATTATATAACAATTTTATCATTCTAAAT  
AATTGTGGTGAAAATAAATAGGTTAAGTCGAATAAAAGGGCTGGAGCATTATTTATGTA  
AATCAAAATAAATGATTAATTATTCGGCATATTTCCCTTATTA AAAAAAANGAGAGAA  
ATTAAACGTATTTTTTTGTTCAATACGGGCGTGTGTTAGGGGTTACAAGGGGGTATTAG  
CTTATTTATCTCCCCTAATTGCATGTTTGATAGGCAACATAAGTTATAGCCTCGGCCCGC  
AAGAAAATCGAGGCCCGCTGTAATTCTACTGTTACACTTAGATTATGGAACCCTGCCCC  
CCCCCACACCCCAATCCCTTTTCTACAGTAGATGACACTAATTTGGGTCTTCCAATT  
TTGGCCTCCCTCGTCTCTCTCACGGTCTCTCTCGCCTTCCGTCAACCACGCCGCGT  
CTCCCTTCCCTTCCCTCAGCCACGACAGCCTCAGTCAGCCGGAGGGCCGCCATCATCG  
CCTCCCTCATCAGCCGCTGCCGACCGATGATAGGGCCCCCTCCTTGCCCGCTCTCATTC  
TTGCGGCTGGACGGCGAACGACGAAGAGTTGCCGCCGCTCGCCTCCCTTTGAGTCTC  
GTCCCTTTGGACGGCGAACGACGAAGAGTCGACGAAGATAGGGCCCCGCTCGCCTC  
CCTTTGAGTCGACGCCGCTCGCCTCGCTTTGGGGGTTGGGCAGATGGGGTTGGATCT  
GGTGCAAGGGGGTGCAATTCGTTGAATAAATTGGGCAGATGGGGGTTGGCGAGGCTG  
AGAAGAAGAATAAAAGGGGTTGGGAGGAGGATCTGCACTGAAAATTTGGGCTGAGGT  
TGGGGGAGATGATCTGCACAACAATTTGGGGTGGGGGGTGGCGAGAATGAGAAGAA  
GAAGAAAATGGGGTGGGGGGTACGTGTACTATCAGATTTTTTTGATAGTTTTTTTATTCT  
TAAATAAAGGGCAAAAAGGTAATTTACTAATTTAATCTTTTTTTTTGAGACAATTTGTTCA  
TTAATCTTAACTTATATATTGTCTATCAAACAAAATATTAGTTATCTCAACGATTATATC  
TTAATATCAAACACCTATAACATATTAACAATCTCACTCAATTTATATTTATCTAGGTT  
TTATTTATTATCCATTATCTCATGCCA ACTATCAAACAGGCCCTACATATTTGTTTGAAGT  
TGACGCCCTCCTGCCTCTACAACACTAATTTATTTAAGAATCTTTCTCAGCATTTTCA  
CCACATATCACATATTCTTCCCCCTCTCTCTCTCTCTCACTATTTTCAAGACTTATC

ACATATTCTTCCCCCTCTCTCTTCTCTCTCTCACTATTTTCAAGACTTATCACATATTCT  
TCCCCCTCTCTGTCTCTCTCAAAAAT

SmCYP98A14

AGTAAGGAAGAGAGATATCATCTCTATCATTGCAAACACGACTGAAGCCCTTACGTGG  
ATCAGTTAAGTTCTTGTGACTTAACTGATAACTCTTTACTGAAGAGCTTTCAGTATCAG  
TCGTCAACCCTGTTTGGTCAAAAATAATTTCGGTTAAACAGGTGTCTGGTTTGCTTGT  
AAAGTTTCTTTTCTATCTCTGACTGAGATCCCTCTGATTGAGGTTGGTAGATAGATTA  
AATAGCCTATAGGTGTCTTCCCCCCCCCATACACCTATTTCGCGACCCCCCGGACCT  
AACACTATTCTTTTATGAAAAATTACCACAATTGTTTTTGGGTCCATCAATAAAAAATTG  
CTACTTTTATTTATAATAGTAGAGTCTACACAACCTCCACCCACATCTAAGTAAAACTCTT  
ATTCCACTCACAATTCTATTAATATTTTATTAATAATGTGTCAATTTACGAGGTGACAATTT  
TTTTGTGGTGGGAAGGAGAATATGATTTTGACTATGTTATATTCGCTCTGTCAAAAAA  
AAAACCTCATATCTTTCCTTTTTGGGACGTCCACAAAAAAATTTCTACATATTTTTGAA  
CTATACCTCACTACTTATAATTAAGGCCCCGTTTGATAGGTATATTAGGATATGCCAA  
GATAATTTAAATCAAGATAAATATCGTAGATAATGAGTGATAAATAGCGTATATTTATCGT  
AGATAATGAGTGATAAATAGCGTATATTTGTGTTTGATAATTAAGATGTAATCTCTGAGAT  
AACTAATATTTTATTTGATAGATAATATAAATCAAGATTAATTTAACAATTATTTCAA  
AAAAAAATTAACAGATTACATTTTTGCCCTTAATTTAAGAAATCAAAAGAAAAAA  
TAAATAAATTAAGTATTGACAAAACGTGTCAAATGTCCCAACCCCCACCCCTTTATT  
GAAACACGTATGCCCCACCCCAACCCCAACATAATACTTCTCCTTCTCAGGCTCAC  
CCCTCATCGCCCCACCCACCCAAAATCGTTCTTCTTCTCAGGCTCACCCCTCATGGT  
CACCGCTCCCCACCCCAAAAACAATCCTTCTTCTTTCGCAGACTCGCCTCTCCTATCC  
CTCCCCCTCCTTTTTTTCAAGTATACAAAAAGTATTTATTGAAGTTCCGTTGACTTCAT  
CGCCCCAATATTTCCGTTGACTCCACTGGCCCCATCGCTCTGCCGCTCCCCAACACG  
TCTCCCCCACCCACTTTCTTCCCCAAGCAAATATATCGGTGAATAGAGGAAAAATTC  
ACTCTGCCACCCCAATAGGTGAAAATCGCCCCCAACACTCCGCTGCCGCTCCAACAC  
TTCCATCTCCTAATTGCAGTTCAGATCTCAATGTGCAACAATCGTAAGTGCACGAAGAA  
GAAAAAGCTCTGTTGTTCAGTTGCGAAGAACATAAAAAAATTCATGAGAGTATTCCT  
TCTTTCGTTTTTTGAAGTTGGGTTGAGGGGATAAATTTGTCAATCAGAAAATTAATACT  
CCCTCCGTCCATGAAAGAATTTCTAGGAGGGAGTGACACGGGTTTTAAGAAAAATA  
TTGTTGAGTATATTGAGAGTGGATAAAAGGTAGTTGAATGTATTGGGAGTGGTGAAAA  
GGTGCTATAATTAATATTGGGAGTTGTGAAAAGTGAAAAGTAAGAGGATTATAAGTGGT  
GGGTATAGTCCAAAATAGGTAGGAAGTTCTTTTGTGGACGTCCCAAAAAGGAAAGAT  
AGTAAGTTCTTTCGTGGACGGAGGGAGTACTTGTTACTGTACAAATCAATATTATTGAA  
CTGGGGGTGAGCGGTGGATGTAATTTCTAAGAGAAACAGTGATTTTGGTGCGGGCTTT  
GCCTTTACTGCGGGCCGGGTGTATTATTTATAAAGCCTATCAAACAGATGAAAATGGTG  
AGAAATATAAAGTATCTCACCTAATATACCTATCAAACATGCCCTTACTTTTCACTTTT  
CACAACCTCTCAATATTAATTATAACACATTTTACCCTTCCAATACACTTAACAACCTT  
TTCTCTACTCTCAATACACTCAATAATCTTTTTCTTAAACTCGTGACACTCCCTCATAG  
AAAGTAAATTCATGGACGGAGGAAGTATATTCTAGCGATTCATAACTGTATCAAGTACA  
TTTTAATATCCAGATGATTTAATGATTTATGATCAATTAATAAATGAACCTTCACTTTAC  
TTTAGTTTATGTTGTGACATGTGGATGGACTTTAATTGATAAAATTTCTCCCATCAAATG  
CTAATCGATGCCATTAATTTACCATTTTCAAATGCGTGTACGTTTGTGGACGAGGATGC  
TAGTTGACTCAATGGTCCCTTTTCAATTTATATATATACAAATTCATCCACAATATTCTAT  
TAGTGATTAACACGTGCACATTTATTAACCTTTTCTACTTTTATGACGAGGGAAGCATGTA  
ATTATATTATTCAAGTGTGCACTTAATAAATCTCTTCTTTTCTTTTTTTTACGACAATCTCT  
ATTATCAAATATTACACGAATCGAACTCGAGCTTAGTAATTAGGTGACGAGTTAAGCTC  
AATCAAGAGATTATCAAATATCACACGAATCGAACTCAAGCTCGGTAATTTAGGTTACG  
AGTTAAGCTCAATCAATATGATAAAAAATTAGAATTCAAATTTAAATATTCAAATATTTAAT  
CGGCTGATAATATTATCTATGCAATGCAACTACTAGATTTGTTAGATGATCTCGTACATT

TGAGATTGGAAAAGTTGGAGTTTGGTTTGAATTATAAAGAATAGAAAAATGTTTCACC  
AACTACTAGATTTGTTAGAAAAATGAGAATGAAGAGATACATTGATCCAACAACCAGT  
CCTCCGCCGCCAACTACCCTTCACCACCTGCTCTTGCTCTTGATGATTAATTACTATAAT  
TTCAACACACACCCTTTTAAATTTTAAATCATATTTATCGGTGACTATATTAGACTCTACC  
TCAAGTGAGGCAAGCTCATCCGCAGCAGCC

---

Note: The **bold** bases represent the MYB-related core elements (MBS1, CAACTG; MBS2, CGGTCA; MBS3, TAACTG; MRE, AACCTAA; MBS I , AAAAAAC(C/G)GTTA; MBS II , AAAAGTTAGTTA). The underlined bases were synthesized for EMSA.

Supplementary Table S4. The homologous genes of SmMYB36 in different species

| <b>Organism</b>                   | <b>Defline</b>                           |
|-----------------------------------|------------------------------------------|
| <i>Physcomitrella patens</i>      | Pp3c1_4970V3.2                           |
| <i>Sphagnum fallax</i>            | Sphfalx0111s0046.1                       |
| <i>Selaginella moellendorffii</i> | 109587                                   |
| <i>Amborella trichopoda</i>       | evm_27.model.AmTr_v1.0_scaffold00024.222 |
| <i>Musa acuminata</i>             | GSMUA_Achr11T23500_001                   |
| <i>Spirodela polyrhiza</i>        | Spipo0G0167800                           |
| <i>Brachypodium distachyon</i>    | Bradi1g60106.1                           |
| <i>Brachypodium stacei</i>        | Brast02G211100.1                         |
| <i>Oryza sativa</i>               | LOC_Os01g50110.1                         |
| <i>Panicum hallii</i>             | Pahal.D02873.1                           |
| <i>Panicum virgatum</i>           | Pavir.J00444.1                           |
| <i>Setaria italica</i>            | Seita.4G086300.1                         |
| <i>Setaria viridis</i>            | Sevir.7G295300.1                         |
| <i>Sorghum bicolor</i>            | Sobic.001G340900.1                       |
| <i>Zea mays</i>                   | GRMZM2G000818_T01                        |
| <i>Aquilegia coerulea</i>         | <b>Aquca_011_00570.1</b>                 |
| <i>Kalanchoe laxiflora</i>        | <b>Kalax.0006s0265.1</b>                 |
| <i>Mimulus guttatus</i>           | <b>Migut.A01129.1</b>                    |
| <i>Solanum lycopersicum</i>       | Solyc10g055410.1.1                       |
| <i>Solanum tuberosum</i>          | PGSC0003DMT400034372                     |
| <i>Eucalyptus grandis</i>         | <b>Eucgr.D02099.1</b>                    |
| <i>Vitis vinifera</i>             | <b>GSVIVT01006275001</b>                 |
| <i>Linum usitatissimum</i>        | Lus10033438                              |
| <i>Manihot esculenta</i>          | <b>Manes.02G041300.1</b>                 |
| <i>Populus trichocarpa</i>        | <b>Potri.006G221200.1</b>                |
| <i>Ricinus communis</i>           | <b>28226.m000839</b>                     |
| <i>Salix purpurea</i>             | <b>SapurV1A.1360s0110.1</b>              |
| <i>Citrus sinensis</i>            | <b>orange1.1g028843m</b>                 |
| <i>Citrus clementina</i>          | <b>Ciclev10009521m</b>                   |
| <i>Citrus clementina</i>          | <b>Ciclev10026498m</b>                   |
| <i>Carica papaya</i>              | <b>evm.model.supercontig_46.144</b>      |
| <i>Gossypium raimondii</i>        | <b>Gorai.004G196800.1</b>                |
| <i>Theobroma cacao</i>            | <b>Thecc1EG015933t1</b>                  |
| <i>Arabidopsis lyrata</i>         | 488320                                   |
| <i>Arabidopsis thaliana</i>       | <b>AT5G40330.1</b>                       |
| <i>Boechera stricta</i>           | <b>Bostr.1460s0063.1</b>                 |
| <i>Brassica rapa</i>              | <b>Brara.J01999.1</b>                    |
| <i>Capsella grandiflora</i>       | <b>Cagra.3166s0078.1</b>                 |
| <i>Capsella rubella</i>           | <b>Carubv10001990m</b>                   |
| <i>Eutrema salsugineum</i>        | <b>Thhalv10014715m</b>                   |
| <i>Cucumis sativus</i>            | <b>Cucsa.340790.2</b>                    |
| <i>Fragaria vesca</i>             | <b>mrna07418.1-v1.0-hybrid</b>           |
| <i>Glycine max</i>                | <b>Glyma.05G061900.1</b>                 |
| <i>Malus domestica</i>            | <b>MDP0000226215</b>                     |
| <i>Medicago truncatula</i>        | <b>Medtr4g100720.1</b>                   |
| <i>Phaseolus vulgaris</i>         | <b>Phvul.003G222400.1</b>                |

|                                  |                         |
|----------------------------------|-------------------------|
| <i>Prunus persica</i>            | <b>Prupe.5G065500.1</b> |
| <i>Chlamydomonas reinhardtii</i> | Cre16.g677382.t1.1      |
| <i>Volvox carteri</i>            | Vocar.0011s0012.1       |
| <i>Coccomyxa subellipsoidea</i>  | 12896                   |
| <i>Micromonas pusilla</i>        | 39026                   |
| <i>Micromonas sp</i>             | 73784                   |
| <i>Ostreococcus lucimarinus</i>  | 8749                    |

---

Notes: The analysis was based on the Phytozome database (<https://phytozome.jgi.doe.gov/pz/portal.html>) and NCBI BLAST tool ([https://blast.ncbi.nlm.nih.gov/Blast.cgi?CMD=Web&PAGE\\_TYPE=BlastHome](https://blast.ncbi.nlm.nih.gov/Blast.cgi?CMD=Web&PAGE_TYPE=BlastHome)). The **bold** represents the predicted orthologous genes of SmMYB36.
